1 **Title: Dynamics of the IFT Machinery at the Ciliary Tip**

2 Alternative Title 1: Dissociation of Kinesin-2 from IFT Trains Controls the Length of

3 *Chlamydomonas* Flagella

4

5 **Alexander Chien<sup>1\*</sup> and Sheng Min Shih<sup>2\*</sup>, Raqual Bower<sup>3</sup>, Douglas Tritschler<sup>3</sup>, Mary E.**

6 **Porter<sup>3</sup>, Ahmet Yildiz<sup>1,2,4</sup>**

7 <sup>1</sup>Biophysics Graduate Group, <sup>2</sup>Physics Department, and <sup>4</sup>Department of Molecular and Cell

8 Biology, University of California, Berkeley, Berkeley, CA, 94720. <sup>3</sup>Department of Genetics, Cell

9 Biology, and Development, University of Minnesota, Minneapolis, MN 55455

10 \*These authors contributed equally to this work.

11 Correspondence and requests for materials should be addressed to A.Y. (email:

12 [yildiz@berkeley.edu](mailto:yildiz@berkeley.edu)).

13

14

15 **Abstract:**

16 Intraflagellar transport (IFT) of multiprotein complexes is essential for the elongation and  
17 maintenance of eukaryotic cilia and flagella. Due to the traffic jam of multiple trains at the ciliary  
18 tip, how IFT trains are remodeled in these turnaround zones cannot be determined by  
19 conventional imaging. We developed one-dimensional Photogate imaging and visualized the full  
20 range of movement of single IFT trains and motors in *Chlamydomonas* flagella. Anterograde  
21 trains split apart and the complexes mix with each other at the tip. Dynein-2 is carried to the tip  
22 by kinesin-2 as inactive cargo on anterograde trains. Unlike dynein-2, kinesin-2 detaches from  
23 IFT trains at the tip and diffuses in flagella. As the flagellum grows longer, diffusion delays  
24 return of kinesin-2 to the basal body, depleting available kinesin-2 for anterograde transport. Our  
25 results suggest that dissociation of kinesin-2 from IFT trains serves as a negative feedback  
26 mechanism that facilitates flagellar length control.

## 27 **Introduction**

28 Cilia (or eukaryotic flagella, terms essentially referring to the same organelle) are hair-like  
29 organelles that extend from the plasma membrane of nearly all mammalian cells. The core  
30 structural component of a cilium is the axoneme, a ring of nine unipolar doublet microtubules  
31 surrounding a central pair of singlet microtubules. Cilia play essential roles in cell motility,  
32 generate the movement of fluids over multiciliated surfaces, and sense extracellular signals (Satir  
33 et al., 2010). To assemble and maintain functional cilia, the IFT machinery (Kozminski et al.,  
34 1993) transports axonemal precursors and sensory proteins bidirectionally between the cell body  
35 and the ciliary tip. Defects in IFT are linked to a wide range of human diseases including Bardet-  
36 Biedl syndrome, retinal degeneration, and polycystic kidney disease (Brown and Witman, 2014).

37 Intraflagellar cargoes interact with multiprotein complexes known as IFT particles that are  
38 organized into larger IFT trains as they enter the flagellum (Cole et al., 1998; Lechtreck et al.,  
39 2017; Pigino et al., 2009). In most species, the IFT trains are transported anterogradely from the  
40 base to the tip of a flagellum by heterotrimeric kinesin-2 (Kozminski et al., 1995), but some  
41 species also use a second homodimeric kinesin that cooperates with the heterotrimeric kinesin-2  
42 to build more specialized sensory cilia (Snow et al., 2004). Once the trains reach the tip, they are  
43 reorganized and transported retrogradely to the ciliary base by dynein-2 (Pazour et al., 1999;  
44 Porter et al., 1999; Signor et al., 1999). Along the length of a cilium, the activities of kinesin and  
45 dynein motors are reciprocally coordinated, such that only one type of a motor is active at a time  
46 (Shih et al., 2013). As a result, trains move between the tip and base of the cilium without  
47 significant pauses or back-and-forth motion (Dentler, 2005; Engel et al., 2009) and switch  
48 directions at the turnaround zones (Ishikawa and Marshall, 2011; Laib et al., 2009; Shih et al.,  
49 2013). Dynein-2 requires kinesin-2 activity to reach the ciliary tip, suggesting that it travels as an

50 inactive passenger on anterograde trains (Iomini et al., 2001; Pedersen et al., 2006; Rompolas et  
51 al., 2007). Because anterograde and retrograde IFT trains have different sizes and depart at  
52 different frequencies (Dentler, 2005; Iomini et al., 2001), IFT trains must be remodeled at the  
53 distal tip and the flagellar base.

54 The mechanism underlying the remodeling of IFT complexes at the ciliary tip and base cannot be  
55 directly observed by conventional microscopy methods because multiple trains coexist in these  
56 turnaround zones (Buisson et al., 2013; Iomini et al., 2001; Wren et al., 2013). In this work, we  
57 used PhotoGate (Belyy et al., 2017) to limit the number of fluorescent IFT trains entering the  
58 flagellum of the unicellular algae *Chlamydomonas reinhardtii*. Using this approach, we  
59 monitored the turnaround behavior and remodeling of single IFT trains at the flagellar tip. We  
60 also elucidated the mechanisms by which the kinesin and dynein motors are recycled in this  
61 process and IFT trains reverse their direction of motion. Dynamics of the IFT tip turnover  
62 suggest a new mechanism for how *Chlamydomonas* controls the length of its flagella.

## 63 **Results**

### 64 **IFT trains split apart and mix with each other at the flagellar tip**

65 To monitor IFT movement, we tracked IFT27, a core component of the IFT complex B, in a *pf18*  
66 *IFT27-GFP* strain (Engel et al., 2009; Qin et al., 2007). This strain has paralyzed flagella (*pf*)  
67 that readily adhere to the glass surface, enabling us to monitor IFT under total internal reflection  
68 (TIR) illumination (Engel et al., 2009). Consistent with previous studies (Dentler, 2005; Engel et  
69 al., 2009; Iomini et al., 2001; Kozminski et al., 1993; Shih et al., 2013), IFT trains moved  
70 processively along the length of flagella, reversing direction at the flagellar tip and base (Figure  
71 1a, Video 1). Cargo reversals along the flagellum were not observed. The velocity of IFT27-GFP  
72 was  $2.1 \pm 0.4 \mu\text{m s}^{-1}$  in the anterograde direction and  $3.0 \pm 0.7 \mu\text{m s}^{-1}$  in the retrograde direction

73 (Figure 1-figure supplement 1, mean  $\pm$  s.d., N = 80 trains in each direction). Because a large  
74 number of GFP-labeled trains accumulated at the tip, the dwell and departure of individual trains  
75 at the tip could not be resolved by conventional TIR imaging (Figure 1a).

76 To monitor the turnaround behavior of individual IFT trains at the flagellar tip, we developed  
77 one-dimensional PhotoGate microscopy (Belyy et al., 2017) to track single fluorescent  
78 complexes at the flagellar tip. In this assay, fluorescent trains located at distal parts of a flagellum  
79 were initially photobleached by moving a focused laser beam from the tip of the flagellum to  
80 near its base. We next opened the “gate” by turning off the focused beam until a single  
81 fluorescent train entered the flagellum. The gate beam was repeatedly turned on for 0.2 s at 1 Hz  
82 to photobleach any additional anterograde trains entering the flagellum (Figure 1b, Video 2).  
83 Under these conditions, less than 1% of anterograde IFT trains were able to pass the gate  
84 unbleached. This approach revealed the full range of movement of single fluorescent IFT trains  
85 within the flagellum. IFT movement can be divided into three stages: anterograde movement  
86 toward the tip, pausing at the tip, and returning to the base by retrograde transport. Pausing and  
87 reversal of anterograde trains before reaching the tip were very rare. We directly observed that a  
88 single anterograde train splits into multiple retrograde trains at the tip (Figure 1c-e, Figure 1-  
89 figure supplement 2a), consistent with the studies of IFT in *Chlamydomonas* (Dentler, 2005) and  
90 *Trypanosoma* (Buisson et al., 2013). On average, 2.4 retrograde trains were detected departing  
91 from the tip after the arrival of a single fluorescent anterograde train (Figure 1f, N = 97),  
92 significantly higher than the measured ratios of retrograde to anterograde train frequencies (~1.6)  
93 (Buisson et al., 2013; Dentler, 2005; Iomini et al., 2001; Mijalkovic et al., 2017).

94 These observations suggested that IFT complexes from different anterograde trains recombine  
95 with each other to form retrograde trains at the tip. To test this possibility, we closed the gate

96 after two or three fluorescent anterograde trains entered the flagellum (Figure 1d,e, Videos 3 and  
97 4) and measured the number and return frequency of retrograde trains departing from the tip. If  
98 individual trains split and return without mixing with each other, the number and frequency of  
99 fluorescent retrograde trains would be proportional to the number of fluorescent anterograde  
100 trains. In contrast, we observed 2.4, 3.6 and 4.2 returning trains on average for one, two, and  
101 three incoming trains, respectively (N = 97, 60, 42, Figure 1f). The return frequencies for one,  
102 two, and three incoming fluorescent trains were 0.57, 0.71 and 0.76 s<sup>-1</sup>, respectively. Because the  
103 increase was sub-proportional with the number of anterograde trains, we concluded that the  
104 fluorescent complexes in the anterograde trains disassemble and mix with a pool of “dark”  
105 complexes from the other photobleached trains at the tip before they reorganize into retrograde  
106 trains (Figure 1f). Our conclusions are not markedly affected by the limited number of IFT27-  
107 GFPs per train (~6) or GFP photobleaching under TIR illumination (0.05 s<sup>-1</sup>, see Materials and  
108 Methods). Monte Carlo simulations revealed that the number of retrograde trains still increases  
109 sub-proportionally after photobleaching correction (Figure 1g, Figure 1-figure supplement 3),  
110 supporting the mixing of the IFT complexes at the tip before they reorganize into retrograde  
111 trains.

## 112 **IFT tip turnaround is regulated by dynein activity and extracellular Ca<sup>2+</sup>**

113 When only a single fluorescent anterograde IFT27-GFP train was left unbleached near the base  
114 of the flagellum, the average duration between its arrival at the tip and the initiation of the first  
115 retrograde train was 3.1 ± 0.3 s (mean ± s.e.m., N = 97, Figure 2a), comparable to the tip resting  
116 time of IFT cargos (Craft et al., 2015; Reck et al., 2016; Wren et al., 2013). The tip resting time  
117 histogram fits well to a Gamma distribution with a shape parameter of 3 and a rate constant of ~1  
118 s<sup>-1</sup>, indicating that remodeling of IFT trains occurs rapidly through a multistep process (Figure

119 2a). After the anterograde trains arrive at the tip, they dwell at the tip through a rate limiting  
120 process ( $\tau = 1.3$  s, y intercept of Figure 2b) before they can depart from the tip. Because this  
121 period (tip remodeling time) is independent of the number of fluorescent anterograde trains  
122 (Figure 2b), it may correspond to processing and breakdown of anterograde trains at the tip. The  
123 dwell time between the departure of successive fluorescent retrograde trains from the tip  
124 increased linearly by 1.7 s on average (tip departure time), suggesting that the tip departure is a  
125 purely stochastic process (Figure 2b). When two or three fluorescent anterograde trains were  
126 allowed to pass through the gate, the average tip departure times between successive retrograde  
127 trains were shorter (1.4 and 1.3 s, respectively). This may be due to an increase in the likelihood  
128 of retrograde trains that depart from the tip to have at least one fluorescent GFP.

129 We also tested various signaling regulators to determine their effect on the tip resting time of  
130 IFT27. When extracellular calcium in media (0.34 mM) was chelated using EGTA, the tip  
131 departure time of IFT trains increased to 2.8 s (Welch's t-test,  $p = 0.01$ ), whereas tip remodeling  
132 time (1.4 s) remained unaltered (Figure 2c-d). The dynein inhibitor ciliobrevin D increased the  
133 tip resting time of IFT27 by over two-fold ( $p = 1.3 \times 10^{-4}$ ). Remarkably, the kinase activator  
134 IBMX did not significantly change tip resting time while the kinase inhibitor, H-8, increases the  
135 tip resting time by 37% ( $p = 1.9 \times 10^{-5}$ , Figure 2e and Figure 2-figure supplement 1). The results  
136 indicate that calcium has minimal effect on the breakdown of anterograde trains, but may have a  
137 regulatory role in the assembly or departure of retrograde trains. Tip turnaround is also sensitive  
138 to dynein activity and phosphorylation of the IFT machinery (Liang et al., 2014) or other  
139 unidentified substrates.

#### 140 **Kinesin-2 dissociates from IFT trains at the tip**

141 We next turned our attention to the movement of the IFT motors and their exchange at the

142 flagellar tip. Dynein-2 was tagged with GFP at its light intermediate chain (D1bLIC), which  
143 assembles into the dynein-2 complex and rescues *dlblic* mutant phenotypes (Reck et al., 2016).  
144 In the *dlblic::D1bLIC-GFP* strain, D1bLIC moved continuously in the anterograde and  
145 retrograde directions at velocities similar to that of the IFT trains (Reck et al., 2016) (Figure 3a,  
146 Figure 1-figure supplement 1). Kinesin-2 was tagged with GFP at its nonmotor subunit KAP that  
147 localizes kinesin-2 to the flagellar base (Mueller et al., 2005). In the *fla3::KAP-GFP* strain, KAP  
148 moved primarily in the anterograde direction to the flagellar tip at a similar speed to anterograde  
149 IFT27 (Figure 3b, Figure 1-figure supplement 1). Unlike D1bLIC, retrograde traces of KAP were  
150 not frequently observed (Engel et al., 2009), suggesting that kinesin-2 dissociates from IFT trains  
151 at the tip (Engel et al., 2009, 2012).

152 We performed PhotoGate assays to directly observe the turnaround behavior of the IFT motors at  
153 the flagellar tip. D1bLIC-GFP displayed tip return dynamics comparable to IFT27-GFP (Figure  
154 3c, figure 1-figure supplement 2b, Video 5). After arrival of a single anterograde D1bLIC-GFP  
155 train at the tip, we detected on average 2.5 retrograde D1bLIC trains. The average time until the  
156 departure of the first retrograde train was  $1.8 \pm 0.2$  s (mean  $\pm$  s.e.m., N = 60, Figure 3d), with  
157  $\sim 1.3 \pm 0.2$  s between subsequent trains (Figure 3e). PhotoGate imaging of KAP-GFP cells  
158 showed that single KAP-GFP trains moved anterogradely to the tip and rested at the tip for  $2.2 \pm$   
159  $0.2$  s (N = 95). Unlike D1bLIC, individual KAP-GFP particles moved away from the tip by rapid  
160 saltatory motion (Figure 3f,g, Figure 1-figure supplement 2c, Video 6). Mean square  
161 displacement (MSD) analysis showed that KAP undergoes one-dimensional diffusion at  $1.68 \pm$   
162  $0.04 \mu\text{m}^2 \text{s}^{-1}$  (mean  $\pm$  s.e.m., N = 27 traces) within the flagellum after it departs from the tip  
163 (Figure 3h), consistent with the values measured for other proteins such as tubulin and EB1 that  
164 undergo diffusion within the ciliary space (Craft et al., 2015; Harris et al., 2016). The splitting of



165 single KAP-GFP anterograde trains into smaller diffusing particles was not frequently observed  
166 (Figure 3-figure supplement 1), presumably because they simultaneously depart from the tip.  
167 Similar to IFT27, the tip return time of KAP increased ~50% when the cells were treated with  
168 ciliobrevin D ( $p = 1.6 \times 10^{-3}$ ) and H-8 ( $p = 2.3 \times 10^{-3}$ ). Unlike IFT27, EGTA and IBMX had no  
169 significant effect on tip return time of KAP (Figure 3-figure supplement 1), suggesting that the  
170 tip departures of kinesin and retrograde IFT are independent from each other.

171 We next investigated whether KAP diffuses along the microtubule track in a linear fashion,  
172 similar to a non-processive, microtubule-depolymerizing kinesin, MCAK (Helenius et al., 2006).  
173 In this case, KAP clusters would be expected to move along a microtubule, so the fluctuation in  
174 KAP position at the perpendicular axis would be similar to the error of single particle tracking.  
175 The KAP-GFP particles had lateral fluctuations of  $19 \pm 2$  nm (mean  $\pm$  s.d.) when moving in the  
176 anterograde direction. After departing from the tip, lateral fluctuations of diffusing spots  
177 increased to  $65 \pm 7$  nm (Figure 3i,j), comparable to the radius of the axoneme. The intensity of  
178 fluorescent spots stayed relatively constant during anterograde transport and diffusion,  
179 suggesting that the measured lateral fluctuations are due to diffusive motion rather than  
180 decreased tracking precision. We concluded that after KAP detaches from the flagellar tip, it  
181 freely explores the space between the flagellar membrane and the axonemal surface rather than  
182 sliding along microtubules.

### 183 **Kinesin-2 carries dynein-2 as an inactive passenger during anterograde IFT**

184 To investigate how kinesin-2 and dynein-2 motors interact with anterograde and retrograde trains  
185 and how they are recycled back to the basal body, we transformed a *diblic* mutant with both  
186 *D1bLIC-crCherry* and *KAP-GFP* constructs and simultaneously tracked the movement of KAP  
187 and D1bLIC subunits in the rescued cells (Figure 4-figure supplement 1, Video 7). The *D1bLIC-*

188 *crCherry* transgene rescued the flagellar assembly defects previously observed in the *dlb1c*  
189 mutant, increasing the average flagellar length to  $12.2 \pm 1.6 \mu\text{m}$  (mean  $\pm$  s.d., N = 100 flagella).  
190 Both tagged motors were expressed at near wild-type levels (Figure 4-figure supplement 1). The  
191 velocities of anterograde and retrograde D1bLIC-*crCherry* trains were similar to those observed  
192 with IFT27-GFP and D1bLIC-GFP labeled trains (Figure 4a, Figure 1-figure supplement 1). In  
193 addition, we observed strong co-localization of D1bLIC-*crCherry* and KAP-GFP on anterograde  
194 trajectories (Figure 4a), demonstrating that dynein-2 is carried to the flagella tip by kinesin-2.  
195 Only D1bLIC-*crCherry* trains showed robust retrograde transport, while retrograde traces of  
196 KAP-GFP were rarely observed.

197 To determine which motor first departs from the tip after the arrival of an anterograde train, we  
198 performed two-color Photogate experiments, allowing us to simultaneously track KAP-GFP and  
199 D1bLIC-*crCherry* from individual anterograde trains (Figure 4b,c). Out of 16 cells that were  
200 analyzed, KAP-GFP began diffusive motion before the retrograde movement of D1bLIC-  
201 *crCherry* in 8 cells, D1bLIC-*crCherry* left the tip before KAP-GFP in 5 cells, and both KAP-GFP  
202 and D1bLIC-*crCherry* appeared to exit the tip simultaneously (within 0.24 s) in 3 cells. These  
203 results suggest that kinesin-2 and dynein-2 exit the flagellar tip compartment independently from  
204 each other.

205 Using PhotoGate, we have visualized the turnaround behavior of individual components of the  
206 IFT machinery at the flagellar tip. We have shown that when IFT trains arrive at the tip, they  
207 dissociate from the microtubules into the flagellar matrix. The complexes split apart and mix  
208 with complexes from other trains at the flagellar tip before rebinding to the microtubules and  
209 initiating retrograde transport (Figure 4d). This dynamic disassembly and reassembly process  
210 may lead to differences in the shape and size of anterograde and retrograde trains, as previously

211 observed (Dentler, 2005; Stepanek and Pigino, 2016). Remarkably, remodeling of IFT trains is  
212 completed within  $\sim 1.3$  s, with an  $\sim 1.7$  s average waiting time between the departures of  
213 successive trains that contain complexes from the same anterograde train. These results are  
214 consistent with tip turnaround times measured previously for IFT subunits and axonemal cargoes  
215 (Craft et al., 2015; Qin et al., 2007; Reck et al., 2016; Wren et al., 2013). The analysis of the tip  
216 dwell times under different experimental conditions revealed that disassembly of anterograde  
217 trains and reassembly of the retrograde trains is a multistep process regulated by extracellular  
218 calcium, kinase activity, and the concentration of active dynein motors.

219 Simultaneous tracking of the KAP subunit of kinesin-2 and the LIC subunit of dynein-2 revealed  
220 how these motors are recycled back and forth within a flagellum. Kinesin-2 powers anterograde  
221 trains and dissociates from the IFT trains at the tip. KAP returns to the flagellar base by diffusing  
222 within the flagellum, similar to the diffusion of kinesin-1 in mammalian neurons (Blasius et al.,  
223 2013). We propose that the diffusion of KAP represents the entire heterotrimeric kinesin-2  
224 complex because KAP and the kinesin-2 motor subunits co-sediment in sucrose density gradients  
225 of purified flagella extracts (Cole et al., 1998; Mueller et al., 2005) and neither KAP nor FLA10  
226 accumulate in flagella during inactivation of retrograde transport (Engel et al., 2012; Pedersen et  
227 al., 2006). Diffusion may also play a role in recycling other components to the cell body. During  
228 flagellar disassembly, removal of flagellar components occurs independently of IFT (Stephens,  
229 2000), presumably in a manner similar to kinesin-2.

230 Dynein-2 moves to the tip in association with anterograde trains (Reck et al., 2016). Because  
231 only kinesin motors remain active during anterograde IFT (Shih et al., 2013), we concluded that  
232 dynein-2 is carried as an inactive passenger and it actively engages with microtubules when it  
233 reaches to the flagellar tip (Figure 4d). The average tip turnaround time of dynein-2 is similar to

234 kinesin-2 (Welch's t test,  $p = 0.05$ ), and the initiation of retrograde transport does not require  
235 departure of kinesin-2 motors from the tip.

236 These results differ considerably from the studies of certain mammalian and nematode cilia, in  
237 which two different kinesin-2 motors cooperate during anterograde IFT (Broekhuis et al., 2014;  
238 Prevo et al., 2015; Williams et al., 2014). For example, in mouse olfactory sensory neurons,  
239 heterotrimeric kinesin-2 is capable of moving IFT particles along both middle and distal  
240 segments of the cilium independently of homodimeric Kif17 (Williams et al., 2014). In *C.*  
241 *elegans*, kinesin-2 and OSM-3 function redundantly along the axoneme's middle segment, while  
242 OSM-3 alone transports IFT particles on the distal segment (Snow et al., 2004). These kinesin-2  
243 motors were observed to move in retrograde directions. Unlike studies on *C. elegans*, we did not  
244 observe frequent pausing of anterograde trains and reversal of kinesin-2 and dynein-2 motors  
245 along the length of the cilium (Mijalkovic et al., 2017; Prevo et al., 2015). Most of the reversals  
246 occur at the flagellar tip, and reversal of particles before reaching the tip is rare in  
247 *Chlamydomonas* flagella (Dentler, 2005). In addition, we did not observe acceleration and  
248 deceleration of IFT trains near the turnaround zones, nor instantaneous reversal of dynein-2 at  
249 the ciliary tip (Mijalkovic et al., 2017; Prevo et al., 2015). The reasons for these differences in  
250 IFT dynamics and turnover remain unknown and may be related to variations in ciliary structure  
251 and organization, phosphorylation of kinesin-2 motors (Liang et al., 2014), and posttranslational  
252 modification of the microtubule tracks (Stepanek and Pigino, 2016).

### 253 **Kinesin-2 returns from the ciliary tip to the cell body by diffusion**

254 Dissociation of KAP from IFT trains at the tip is consistent with the recycling of kinesin-2 to the  
255 cell body in the absence of active retrograde IFT (Pedersen et al., 2006). However, it remained  
256 unclear how kinesin-2 achieves this long-range movement without active transport. To test

257 whether diffusion from the tip effectively recycles KAP to the cell body, we performed  
258 fluorescence recovery after photobleaching (FRAP) assays in the middle sections of full-length  
259 flagella of *fla3::KAP-GFP* cells (~12  $\mu\text{m}$ , Figure 5a, Video 8). Directional movements of KAP-  
260 GFP labeled trains into the photobleached area were seen from the anterograde direction,  
261 whereas recovery of GFP fluorescence from the retrograde direction was primarily due to  
262 diffusion of KAP-GFP from the tip. These results suggest that the high fluorescent background  
263 seen in KAP-GFP flagella was caused by kinesin-2 motors dissociated from IFT trains at the tip.  
264 The diffusion constant calculated from the fluorescence recovery ( $1.8 \pm 0.1 \mu\text{m}^2 \text{s}^{-1}$ , Figure 5b)  
265 was similar to the result of the MSD analysis (Figure 3h). Fluorescent background in KAP-GFP  
266 flagella increased towards the tip, suggesting an efflux of diffusing KAP-GFP towards the cell  
267 body (Figure 5c,d). During flagellar regrowth, the KAP-GFP gradient was maintained for all  
268 flagellar lengths (Figure 5-figure supplement 1a, see Materials and Methods). The influx of  
269 KAP-GFP fluorescence from the base to the flagellum through anterograde IFT was statistically  
270 indistinguishable from the estimated efflux of KAP-GFP to the base through one-dimensional  
271 diffusion in flagella (Welch's t-test,  $p = 0.80$ ,  $N = 57$ , Figure 5-figure supplement 2, see Materials  
272 and Methods). These results strongly indicate that KAP-GFP returns to the cell body by diffusing  
273 from the flagellar tip.

274 We ran Monte Carlo simulations to estimate the accumulation of KAP in a flagellum in a steady-  
275 state using the measured values of IFT train loading (Engel et al., 2009), diffusion coefficient,  
276 flagellar length, and IFT train frequency. The model assumes that KAP is released from  
277 anterograde IFT trains at the tip, diffuses within a flagellum, and is taken up by the basal body.  
278 Under these conditions, simulations confirmed the build-up of a linear concentration gradient of  
279 KAP in the flagellum (Figure 5-figure supplement 1b). In fully-grown flagella, the return of KAP

280 to the flagellar base takes 42 s on average, an order of magnitude longer than the travel of  
281 retrograde trains (4 s) to the base. This delay leads to a ~4-fold higher amount of KAP inside the  
282 flagellum compared to a case in which KAP returns to the base with retrograde trains (Figure 5-  
283 figure supplement 1c). Unlike KAP, IFT27 has low fluorescence background without an obvious  
284 concentration gradient along the length of the flagellum (Figure 5d) due to active transport of the  
285 IFT trains in both directions.

### 286 **Kinesin-2 is depleted from the basal body during flagellar regrowth**

287 KAP-GFP loading on IFT particles has been shown to decrease with increasing flagellar length  
288 (Engel et al., 2009), but the underlying mechanism remained unclear. We reasoned that, as the  
289 flagella elongate, diffusion of KAP from the tip to the base takes a longer time and a larger  
290 amount of KAP builds up in the flagellum. This may deplete the amount of KAP available at the  
291 flagellar base and lead to decreased loading of KAP onto the subsequent IFT trains. To test this  
292 model, we deflagellated *fla3::KAP-GFP* cells and measured the GFP fluorescence at the basal  
293 body and in the flagellum at various times during flagellar regrowth using confocal microscopy  
294 (Figure 6a). We estimated that the total amount of KAP localized to the base and flagellum  
295 increased by two-fold with flagellar length, indicating the upregulation of IFT components  
296 during flagellar growth. The fluorescence intensity at the flagellar base was highest for short  
297 flagella (1-4  $\mu\text{m}$ ) and decreased ~4-fold as cells have grown full-length flagella (~10  $\mu\text{m}$ , Figure  
298 6b), significantly larger than ~1.6-fold reduction reported previously (Ludington et al., 2015). We  
299 also observed that the KAP fluorescence in the flagellum was low in short flagella and increased  
300 ~10-fold as the flagellar length reached the steady-state (Figure 6b).

301 Changes in the amount of IFT complexes were markedly different from that of KAP during  
302 flagellar regrowth (Figure 6a). In *IFT20::IFT20 GFP* cells, the GFP signal in the flagellum

303 increased with flagellar length (Figure 6c). This is in contrast to the previous reports showing  
304 that total amount of IFT components remains constant during flagellar regeneration (Marshall  
305 and Rosenbaum, 2001), but agrees with the proportional reduction in the IFT train size with  
306 flagellar length (Engel et al., 2009). Unlike KAP-GFP, basal body fluorescence of IFT20-GFP  
307 remained nearly constant across all flagellar lengths (Figure 6c). We concluded that depletion at  
308 the base and accumulation in the flagella were not observed for IFT complexes because they are  
309 rapidly returned to the base through active transport.

## 310 **Discussion**

311 Cilia and flagella serve as a model system to study how cells precisely control organelle size  
312 because they elongate only in one direction. According to the balance point model, flagellar  
313 length is set when flagellar assembly and disassembly rates reach equilibrium (Marshall et al.,  
314 2005). While the disassembly rate is independent of flagellar length (Kozminski et al., 1995), the  
315 assembly rate is determined by the injection of IFT trains. The amount of material being  
316 transported by these trains to the tip is correlated strongly with the amount of material localized  
317 to the flagellar base (Ludington et al., 2013, 2015; Wren et al., 2013), which serves as a loading  
318 dock. Previous studies showed that IFT train size and the number of ciliary cargos per train  
319 scales inversely with flagellar length (Craft et al., 2015; Engel et al., 2009), but it remained  
320 unclear which essential component of the IFT machinery limits the assembly of IFT trains as the  
321 flagellum elongates (Rosenbaum et al., 1969).

322 We propose that dissociation of kinesin-2 from IFT trains serves as a negative feedback  
323 mechanism to control the length of *Chlamydomonas* flagella (Ludington et al., 2015). Our results  
324 show that the majority of kinesin-2 dissociates from IFT trains at the flagellar tip and diffuses  
325 within the flagellum. Diffusion leads to a large accumulation of kinesin-2 in the flagellum (Craft

326 et al., 2015) as the flagellum grows longer, while the amount of kinesin-2 at the base decreases  
327 several-fold. As a result, lower amounts of kinesin-2 are available to bring new anterograde IFT  
328 trains to the flagellar tip. This may lead to a reduction in the IFT train size and the rate of  
329 flagellar assembly as the flagella grow longer (Figure 6d,e).

330 Consistent with this model, previous studies showed that KAP intensity at the basal body  
331 correlates with KAP loading on IFT trains and the assembly rate during flagellar regeneration  
332 (Ludington et al., 2013). In the temperature-sensitive mutant strain *fla10<sup>ts</sup>*, inactivation of  
333 kinesin-2 motility ceases IFT and leads to resorption of the flagellum at a constant rate  
334 (Kozminski et al., 1995; Marshall et al., 2005). At intermediate temperatures, flagellar length  
335 correlates strongly with the estimated fraction of active kinesin-2 motors in *fla10<sup>ts</sup>* cells  
336 (Marshall and Rosenbaum, 2001), indicating that the amount of active kinesin-2 limits flagellar  
337 growth. Unlike kinesin-2, IFT components are rapidly recycled to the cell body by dynein-2 and  
338 the amount of these components at the flagellar base remains nearly constant as the flagellum  
339 elongates. Therefore, the abundance of IFT components at the flagellar base is not limiting to  
340 maintain flagellar length, and the cells grow full length flagella upon partial knockdown of IFT  
341 components (Qin et al., 2007).

342 Diffusion is also proposed to play a role in setting the length of bacterial flagella (Renault et al.,  
343 2017), long polymers made from a single protein flagellin. Similar to the flagellar length control  
344 model originally proposed for *Chlamydomonas* (Levy, 1974), flagellins are injected into the  
345 channel of the filament and they diffuse to reach the assembly site at the filament tip, generating  
346 a concentration gradient decreasing towards the tip. As the filament gets elongates, it grows more  
347 slowly because it takes longer for the components to reach the tip. In contrast to bacterial  
348 flagellin, structural components are carried to the tip by IFT in eukaryotic flagella. In



349 *Chlamydomonas*, diffusion of kinesin-2 from the tip sets a concentration gradient decreasing  
350 towards the basal body and its return to the flagellar base is delayed as the flagellum gets longer.  
351 While kinesin-2 diffusion can account for setting the equilibrium length in the balance-point  
352 model (Ludington et al., 2015), other mechanisms must also exist to control assembly and  
353 disassembly of *Chlamydomonas* flagella (Pan et al., 2004). Our results show that IFT  
354 components are upregulated and they accumulate in large numbers at the flagellar base after  
355 deflagellation (Lefebvre and Rosenbaum, 1986). A large pool of IFT components in the  
356 cytoplasm partially exchanges with the flagellar pool (Buisson et al., 2013; Engel et al., 2009),  
357 because cells can grow half-length flagella after deflagellation under complete inhibition of  
358 protein synthesis (Rosenbaum et al., 1969). The mechanisms that control the expression of IFT  
359 components after deflagellation, regulate the exchange of material between the basal body and  
360 cytoplasm, and load material onto IFT trains remain poorly understood. Further studies in mutant  
361 cell lines that have abnormally long (Nguyen et al., 2005; Tam et al., 2007) or short flagella may  
362 also reveal which proteins specifically regulate these processes.

## 363 **Materials and Methods**

### 364 **Strains and cell culture**

365 The *pf18 IFT27-GFP* strain was obtained from the Marshall laboratory (University of California  
366 San Francisco) after crossing the *IFT27-GFP* transgene into the *pf18* background as previously  
367 described (Engel et al., 2009; Qin et al., 2007). The *ift20::IFT20-GFP* strain (Lechtreck et al.,  
368 2009) was obtained from the Lechtreck laboratory (University of Georgia). The *fla3::KAP-GFP*  
369 (Mueller et al., 2005) and *diblic::D1bLIC-GFP* (Reck et al., 2016) strains are available from  
370 *Chlamydomonas* Resource Center at the University of Minnesota. The *diblic::D1bLIC-crCherry*  
371 *KAP-GFP* strain was generated as described below. Strains were maintained on plates of TAP  
372 media containing 1% agar. For light microscopy, vegetative cells were resuspended in liquid TAP  
373 media at 22 °C for 24-48 hours and passaged to fresh liquid TAP before introducing into a flow  
374 chamber.

### 375 **Isolation and characterization of the *diblic::D1bLIC-crCherry KAP-GFP* strain.**

376 The *D1bLIC-crCherry* construct was generated by subcloning a *Chlamydomonas* codon  
377 optimized version of the Cherry tag into a genomic copy of the *D1bLIC* gene (Reck et al., 2016).  
378 The Cherry tag was amplified by PCR from the plasmid pBR9 mCherryCr (Rasala et al., 2013)  
379 and inserted into a unique *AscI* site located in the last exon of *D1bLIC*. The *D1bLIC-crCherry*  
380 construct was linearized with *BamHI* and co-transformed into *diblic* (CC-4487) with the  
381 selectable marker pSII03 and plated on TAP medium plus 10 µg/ml paromomycin. 960  
382 transformants were picked into TAP media and screened for changes in colony morphology. 84  
383 colonies were further examined by both phase contrast and fluorescence microscopy for rescue  
384 of flagellar assembly and expression of Cherry. Isolated flagella from four colonies were  
385 analyzed by Western blot for the presence of full-length *D1bLIC-Cherry*. A single colony was

386 selected for a second round of transformation using the *KAP-GFP* construct (Mueller et al.,  
387 2005) and the plasmid pHyg3 (Berthold et al., 2002) and selection on 10 µg/ml of hygromycin B.  
388 Two out of 96 transformants were identified as positive for both GFP and Cherry by fluorescence  
389 microscopy, and Western blots of isolated flagella confirmed the presence of both D1bLIC-  
390 Cherry and KAP-GFP in the rescued strains. Antibodies used included a rat antibody against  
391 *Chlamydomonas* KAP (Mueller et al., 2005), a mouse antibody against GFP (Covance, Inc.), a  
392 rabbit antibody against *Chlamydomonas* D1bLIC (Perrone et al., 2003), and a rabbit antibody  
393 against mCherry (Rockland Immunochemicals).

#### 394 **Drug treatment**

395 0.34 mM Ca<sup>2+</sup> in TAP media was depleted by adding 0.5 mM EGTA, which resulted a free Ca<sup>2+</sup>  
396 concentration of 1.5 µM. The concentration of free Ca<sup>2+</sup> in the assay buffer as a function of  
397 added EGTA was calculated from the Chelator program (<http://maxchelator.stanford.edu>). For  
398 drug treatment assays, a final concentration of 0.1 mM ciliobrevin D, 5 mM db-cAMP and  
399 IBMX, or 1 mM kinase inhibitor H-8 was added to the TAP media, and the data was collected 5-  
400 10 minutes after the treatment.

#### 401 **Deflagellation and flagellar regrowth**

402 For imaging the diffusion gradient in live *fla3::KAP-GFP* cells, we deflagellated cells in TAP  
403 media using shear force by rapidly pushing them through a 20G1 ½ syringe. Cells regenerating  
404 flagella were imaged in the following hour. For imaging the accumulation of GFP signal at the  
405 basal body region and in regenerating flagella, *fla3::KAP-GFP* and *IFT20::IFT20-GFP* cells  
406 were deflagellated with pH shock by adding 60 µl 0.5 N acetic acid to 1 ml of cells in TAP  
407 media, waiting 45 seconds, and adding 60 µl 0.5 N KOH. Cells were fixed 15, 30, 45, 60, and 75  
408 minutes after pH shock. Fixation was done by pipetting 200 µl of liquid TAP cell culture onto a

409 poly-lysine treated coverslip for 1 minute, then gently treating the coverslip with 4%  
410 paraformaldehyde in water for 10 min. Afterwards, the coverslip was treated twice with 100%  
411 methanol chilled to -20 °C for 5 minutes. Coverslips were dipped in water to remove methanol,  
412 mounted in a flow chamber with TAP media, and then imaged immediately.

### 413 **TIR microscopy**

414 A custom-built objective-type TIR fluorescence microscope was set up, using a Nikon TiE  
415 inverted microscope equipped with a perfect focusing unit, bright-field illumination, and a 100X  
416 1.49 NA PlanApo oil immersion objective (Nikon). 488 nm and 561 nm solid state lasers  
417 (Coherent) were used for GFP and crCherry excitation, respectively. The angle of incident light  
418 was adjusted lower than the critical angle to illuminate a deeper field (~300 nm) near the  
419 coverslip surface. The fluorescent signal was recorded by an Andor iXon 512 x 512 electron-  
420 multiplied charge-coupled device (EM-CCD) camera. 1.5x extra magnification was used to  
421 obtain an effective pixel size of 106 nm. Data was collected at 10 Hz. Excitation laser beams  
422 were controlled by shutters (Uniblitz). Because the CCD image saturates under intense laser  
423 illumination of the focused gate beam, shutter timing was synchronized with the camera  
424 acquisition by a data acquisition card (NI, USB-6221) to minimize the number of saturated  
425 frames in recorded movies. For two-color imaging, GFP and crCherry fluorescence were  
426 separated into two channels on a CCD using Optosplit II (Cairn). To avoid bleed-through  
427 between channels, movies were acquired using a time-sharing between 488 nm and 561 nm laser  
428 beams, synchronized with camera acquisition at 60 ms frame time. The effective pixel size was  
429 160 nm.

### 430 **PhotoGate assays**

431 PhotoGate assays were performed as previously described (Belyy et al., 2017). Briefly, a 488-nm

432 laser beam was split into two paths using a half-wave plate and a polarizer beamsplitter cube.  
433 The first path was used for objective-type TIRF imaging. The second path was focused (2 MW  
434  $\text{cm}^{-2}$ ) to the image plane and steered with a fast piezo-driven mirror (S-330.8SL, Physik  
435 Instrumente). The piezo-driven mirror was mounted at a position conjugate to the back-focal  
436 plane of the objective to ensure that the tilting of the mirror resulted in pure translation of the  
437 focused beam in the image plane. The mirror provided a usable travel range of  $30 \mu\text{m} \times 30 \mu\text{m}$   
438 area at the image plane. The mirror's angle was updated via analog output channels of a data  
439 acquisition card (NI, USB-6221) and controlled by software custom-written in LabVIEW.

440 Flagellar orientation of surface adhered cells was visualized by TIRF imaging. Initially, the gate  
441 beam was placed at the tip of flagellum and moved along the flagellar orientation to prebleach  
442 the distal half of the flagellum. The gate beam was turned off when it was positioned near the  
443 base of the flagellum to allow a single fluorescent anterograde train to enter the flagellum.  
444 Occasionally (<5%), two anterograde trains overlapped and entered the flagellum  
445 simultaneously. The gate beam was then turned on for 0.2 s of every 1 s to bleach other  
446 anterograde trains. Under these conditions, less than 1% of anterograde IFT trains moved faster  
447 than the cutoff speed ( $3.0 \mu\text{m s}^{-1}$ ) and were able to escape the gate. The trajectories of these  
448 trains can be distinguished from each other as they move at different speeds along the flagellum.  
449 The locations of flagellar tips were determined by brightfield imaging (data not shown). In two-  
450 color photogate experiments, the focused 488-nm laser beam was used to bleach both GFP and  
451 crCherry and 488 and 561 beams were used in a time-sharing mode for TIR excitation.

#### 452 **FRAP assays**

453 FRAP assays on the *fla3::KAP-GFP* strain were performed by photobleaching the center part of  
454 the flagellum ( $5 \mu\text{m}$  in length) for 200 ms at  $25 \text{ kW cm}^{-2}$  in the epifluorescence mode. The

455 recovery of fluorescence signal in the bleached area was simultaneously monitored by imaging  
456 with a  $100 \text{ W cm}^{-2}$  TIRF excitation. The analysis was performed by measuring the total  
457 fluorescence intensity within the bleached area. Fluorescent signal of anterograde transport was  
458 manually excluded from the analysis. 13 different recovery traces were used in the MSD  
459 analysis. The intensity of each trace was normalized according to the initial and final intensity.

#### 460 **Confocal microscopy**

461 *fla3::KAP-GFP* and *IFT20::IFT20-GFP* cells were fixed with paraformaldehyde at 15, 30, 45,  
462 60, and 75 min intervals after deflagellation, as described above. The sample was imaged on a  
463 Zeiss confocal microscope using 488 nm laser excitation. Images were recorded with 560 nm  $z$   
464 step, 63 nm pixel size, and 1.58  $\mu\text{s}$  photon collection per pixel. Fluorescence in basal body and  
465 flagellum was quantified using ImageJ. The ratio of flagellar to basal-body KAP-GFP  
466 fluorescence in confocal images was similar to that of images recorded with TIR excitation,  
467 indicating that the fixation protocol did not result in the loss of diffusing KAP-GFP signal from  
468 the flagella. We confirmed that fixation did not alter the relative amount of KAP-GFP in the  
469 flagellum and the base by comparing the flagellum to base fluorescence ratio in live and fixed  
470 *fla3::KAP-GFP* cells.

#### 471 **Data analysis**

472 Anterograde and retrograde trajectories were manually assigned from kymographs. After the  
473 arrival of a single anterograde particle at the tip, the departure of fluorescent retrograde trains  
474 was determined at a single pixel and frame resolution. The tip return time for each retrograde  
475 train was defined as the duration between the arrival of the fluorescent anterograde train and the  
476 departure of the retrograde train from the tip. Tip return time histograms were constructed and  
477 fitted to a Gamma function using MATLAB. The Gamma function was defined as  $\Gamma(t) = t^{\alpha-1} e^{-\lambda t}$ ,

478 where  $\alpha$  and  $\lambda$  are shape and rate parameters, respectively.

479 For single particle tracking analysis, the positions of fluorescent spots were determined by fitting  
480 the PSFs to a 2D Gaussian. The positions were fitted throughout the movie except at the frames  
481 when the gate beam was on or the frames in which the tracked particle overlapped with other  
482 fluorophores. The intensity of the fluorescent spots was estimated by the volume of the 2D  
483 Gaussian peak. In a typical assay, we adjusted excitation power to achieve 20-nm localization  
484 accuracy at 10 Hz image acquisition rate. Individual GFP spots were tracked for 5 s on average  
485 before photobleaching and diffusion constant was obtained by the MSD analysis of individual  
486 spots.

487 To determine the distribution of the KAP-GFP background in flagella, anterograde trajectories in  
488 kymographs of *fla3::KAP-GFP* cells were manually removed using custom ImageJ plugins. The  
489 remaining pixels were averaged over the kymograph's time axis, giving a time-averaged plot of  
490 the KAP-GFP background over the flagellum length. The cells were grouped by flagellar length.  
491 The background intensity and flagellum length of each cell were normalized. The average  
492 background intensity along the length of the flagellum was calculated for each group of cells.

493 KAP-GFP efflux from the flagellum was calculated using Fick's law. The slope of the KAP-GFP  
494 background over the length of a flagellum was multiplied by the diffusion constant ( $1.7 \mu\text{m}^2 \text{s}^{-1}$ ).  
495 To calculate KAP-GFP influx, the KAP-GFP background was subtracted from the kymographs.  
496 Then, the average intensity of anterograde trains was multiplied by the train frequency ( $1.3 \text{ trains}$   
497  $\text{s}^{-1}$ ) to calculate the influx.

#### 498 **Monte Carlo simulations**

499 Monte Carlo simulations were performed to test the effect of limited number of GFPs per train

500 and GFP photobleaching in PhotoGate experiments using the *pf18 IFT27-GFP* strain.  
501 Experimentally measured values were used for the velocity and frequency of anterograde and  
502 retrograde trains. Simulations assumed that retrograde trains depart from the tip through a purely  
503 stochastic process, with two distinct rates determined in the experiments.

504 We estimated that each anterograde train contains 6 fluorescent GFPs by comparing the  
505 fluorescent intensities of anterograde trains in the *pf18 IFT27-GFP* strain to those of KAP-GFP  
506 spots in the *fla3::KAP-GFP* strain under the same imaging conditions and calibrating the number  
507 of molecules based on previous photobleaching analysis of the *fla3::KAP-GFP* strain<sup>36</sup>. Each  
508 retrograde train was constructed by a random selection of IFT particles available at the tip. Tip  
509 intensity measurements revealed that the signal of the IFT complexes located at the tip is three  
510 times brighter than an average anterograde train. The photobleaching of GFPs ( $0.05 \text{ s}^{-1}$ ) under  
511 TIR illumination was accounted for in simulations and trains with at least one fluorescent GFP  
512 were marked detectable.

513 Simulations were also run to estimate the distribution of diffusing KAP molecules in the  
514 flagellum at a steady-state. In these simulations, previously reported values for the anterograde  
515 train injection rate ( $1.3 \text{ trains s}^{-1}$ ) (Mueller et al., 2005) and the average number of KAP bound to  
516 a single anterograde train for each flagellar length (Engel et al., 2009) were used to estimate the  
517 number of KAP that arrives at the flagellar tip per second. KAP dissociated from the trains at the  
518 tip and immediately started one dimensional diffusion in the flagellum. The remodeling time of  
519 KAP at the tip was insignificant, and was not accounted for. The flagellum was modeled as a 5 -  
520  $12 \mu\text{m}$  long linear grid with spacing defined as the MSD of KAP diffusing at  $1.7 \mu\text{m}^2 \text{ s}^{-1}$  (Figure  
521 3h) during the time-step of the simulation (5 ms). At every time point, each active molecule had  
522 its grid position changed by +1 or -1. The molecules at the extreme terminus of the tip only



523 moved towards the base. The diffusing KAP molecules were perfectly absorbed to the cell body  
524 as they arrived at the flagellar base (i.e. perfect sink) and exited the simulation. The simulations  
525 were run for 100,000 time points to allow molecules to reach a steady-state. The number of  
526 molecules at each grid position was calculated to plot the distribution of KAP molecules  
527 diffusing along the length of the flagellum. The total number of KAP was calculated by  
528 integrating the number of KAP diffusing along the entire flagellum and KAP on the anterograde  
529 trains. This number was compared to a hypothetical scenario that KAP returns to the cell body  
530 with active transport. The simulations were run 10 times to calculate the error.

### 531 **Data and code availability**

532 All data and simulation code that support the conclusions are available from the authors on  
533 request.

534 **References**

- 535 Belyy, V., Shih, S.-M., Bandaria, J., Huang, Y., Lawrence, R.E., Zoncu, R., and Yildiz, A. (2017).  
536 PhotoGate microscopy to track single molecules in crowded environments. *Nat. Commun.* 8,  
537 13978.
- 538 Berthold, P., Schmitt, R., and Mages, W. (2002). An engineered *Streptomyces hygroscopicus* aph  
539 7" gene mediates dominant resistance against hygromycin B in *Chlamydomonas reinhardtii*.  
540 *Protist* 153, 401–412.
- 541 Blasius, T.L., Reed, N., Slepchenko, B.M., and Verhey, K.J. (2013). Recycling of Kinesin-1  
542 Motors by Diffusion after Transport. *PLoS One* 8, 45–49.
- 543 Broekhuis, J.R., Verhey, K.J., and Jansen, G. (2014). Regulation of cilium length and  
544 intraflagellar transport by the RCK-kinases ICK and MOK in renal epithelial cells. *PLoS One* 9.  
545 Brown, J.M., and Witman, G.B. (2014). Cilia and diseases. *Bioscience* 64, 1126–1137.
- 546 Buisson, J., Chenouard, N., Lagache, T., Blisnick, T., Olivo-Marin, J.-C.J.-C., and Bastin, P.  
547 (2013). Intraflagellar transport proteins cycle between the flagellum and its base. *J. Cell Sci.* 126,  
548 327–338.
- 549 Cole, D.G., Diener, D.R., Himelblau, A.L., Beech, P.L., Fuster, J.C., and Rosenbaum, J.L.  
550 (1998). *Chlamydomonas* kinesin-II-dependent intraflagellar transport (IFT): IFT particles contain  
551 proteins required for ciliary assembly in *Caenorhabditis elegans* sensory neurons. *J. Cell Biol.*  
552 141, 993–1008.
- 553 Craft, J.M., Harris, J.A., Hyman, S., Kner, P., and Lehtreck, K.F. (2015). Tubulin transport by  
554 IFT is upregulated during ciliary growth by a cilium-autonomous mechanism. *J. Cell Biol.* 208,  
555 223–237.
- 556 Dentler, W. (2005). Intraflagellar transport (IFT) during assembly and disassembly of  
557 *Chlamydomonas* flagella. *J. Cell Biol.* 170, 649–659.
- 558 Engel, B.D., Ludington, W.B., and Marshall, W.F. (2009). Intraflagellar transport particle size  
559 scales inversely with flagellar length: Revisiting the balance-point length control model. *J. Cell*  
560 *Biol.* 187, 81–89.
- 561 Engel, B.D., Ishikawa, H., Wemmer, K. a., Geimer, S., Wakabayashi, K.I., Hirono, M., Craige,  
562 B., Pazour, G.J., Witman, G.B., Kamiya, R., et al. (2012). The role of retrograde intraflagellar  
563 transport in flagellar assembly, maintenance, and function. *J. Cell Biol.* 199, 151–167.
- 564 Harris, J.A., Liu, Y., Yang, P., Kner, P., and Lehtreck, K.F. (2016). Single-particle imaging

565 reveals intraflagellar transport-independent transport and accumulation of EB1 in  
566 *Chlamydomonas* flagella. *Mol. Biol. Cell* 27, 295–307.

567 Helenius, J., Brouhard, G., Kalaidzidis, Y., Diez, S., and Howard, J. (2006). The depolymerizing  
568 kinesin MCAK uses lattice diffusion to rapidly target microtubule ends. *Nature* 441, 115–119.

569 Iomini, C., Babaev-Khaimov, V., Sassaroli, M., and Piperno, G. (2001). Protein particles in  
570 *Chlamydomonas* flagella undergo a transport cycle consisting of four phases. *J. Cell Biol.* 153,  
571 13–24.

572 Ishikawa, H., and Marshall, W.F. (2011). Ciliogenesis: building the cell’s antenna. *Nat Rev Mol*  
573 *Cell Biol* 12, 222–234.

574 Kozminski, K.G., Johnson, K. a, Forscher, P., and Rosenbaum, J.L. (1993). A motility in the  
575 eukaryotic flagellum unrelated to flagellar beating. *Proc. Natl. Acad. Sci. U. S. A.* 90, 5519–  
576 5523.

577 Kozminski, K.G., Beech, P.L., and Rosenbaum, J.L. (1995). The *Chlamydomonas* kinesin-like  
578 protein FLA10 is involved in motility associated with the flagellar membrane. *J. Cell Biol.* 131,  
579 1517–1527.

580 Laib, J.A., Marin, J.A., Bloodgood, R.A., and Guilford, W.H. (2009). The reciprocal  
581 coordination and mechanics of molecular motors in living cells. *Proc Natl Acad Sci U S A* 106,  
582 3190–3195.

583 Lechtreck, K.-F., Johnson, E.C., Sakai, T., Cochran, D., Ballif, B. a, Rush, J., Pazour, G.J., Ikebe,  
584 M., and Witman, G.B. (2009). The *Chlamydomonas reinhardtii* BBSome is an IFT cargo  
585 required for export of specific signaling proteins from flagella. *J. Cell Biol.* 187, 1117–1132.

586 Lechtreck, K.F., Van De Weghe, J.C., Harris, J.A., and Liu, P. (2017). Protein transport in  
587 growing and steady-state cilia. *Traffic*.

588 Lefebvre, P. a, and Rosenbaum, J.L. (1986). Regulation of the synthesis and assembly of ciliary  
589 and flagellar proteins during regeneration. *Annu. Rev. Cell Biol.* 2, 517–546.

590 Levy, E.M. (1974). Flagellar elongation as a moving boundary problem. *Bull. Math. Biol.* 36,  
591 265–273.

592 Liang, Y., Pang, Y., Wu, Q., Hu, Z., Han, X., Xu, Y., Deng, H., and Pan, J. (2014). FLA8/KIF3B  
593 Phosphorylation Regulates Kinesin-II Interaction with IFT-B to Control IFT Entry and  
594 Turnaround. *Dev. Cell* 30, 585–597.

595 Ludington, W.B., Wemmer, K. a, Lechtreck, K.F., Witman, G.B., and Marshall, W.F. (2013).

596 Avalanche-like behavior in ciliary import. *Proc. Natl. Acad. Sci. U. S. A.* *110*, 3925–3930.  
597 Ludington, W.B., Ishikawa, H., Serebrenik, Y. V., Ritter, A., Hernandez-Lopez, R.A.,  
598 Gunzenhauser, J., Kannegaard, E., and Marshall, W.F. (2015). A systematic comparison of  
599 mathematical models for inherent measurement of ciliary length: How a cell can measure length  
600 and volume. *Biophys. J.* *108*, 1361–1379.  
601 Marshall, W.F., and Rosenbaum, J.L. (2001). Intraflagellar transport balances continuous  
602 turnover of outer doublet microtubules: implications for flagellar length control. *J. Cell Biol.*  
603 *155*, 405–414.  
604 Marshall, W., Qin, H., Brenni, M., and Rosenbaum, J. (2005). Flagellar Length Control System:  
605 Testing a Simple Model Based on Intraflagellar Transport and Turnover. *Mol. Biol. Cell* *16*, 270–  
606 278.  
607 Mijalkovic, J., Prevo, B., Oswald, F., Mangeol, P., and Peterman, E.J.G. (2017). Ensemble and  
608 single-molecule dynamics of IFT dynein in *Caenorhabditis elegans* cilia. *Nat. Commun.* *8*,  
609 14591.  
610 Mueller, J., Perrone, C.A., Bower, R., Cole, D.G., and Porter, M.E. (2005). The FLA3 KAP  
611 Subunit Is Required for Localization of Kinesin-2 to the Site of Flagellar Assembly and  
612 Processive Anterograde Intraflagellar Transport. *Mol. Biol. Cell* *16*, 1341–1354.  
613 Nguyen, R.L., Tam, L.W., and Lefebvre, P.A. (2005). The LF1 gene of *Chlamydomonas*  
614 *reinhardtii* encodes a novel protein required for flagellar length control. *Genetics* *169*, 1415–  
615 1424.  
616 Pan, J., Wang, Q., and Snell, W.J. (2004). An aurora kinase is essential for flagellar disassembly  
617 in *Chlamydomonas*. *Dev. Cell* *6*, 445–451.  
618 Pazour, G.J., Dickert, B.L., and Witman, G.B. (1999). The DHC1b (DHC2) isoform of  
619 cytoplasmic dynein is required for flagellar assembly. *J Cell Biol* *144*, 473–481.  
620 Pedersen, L.B., Geimer, S., and Rosenbaum, J.L. (2006). Dissecting the molecular mechanisms  
621 of intraflagellar transport in *Chlamydomonas*. *Curr. Biol.* *16*, 450–459.  
622 Perrone, C.A., Tritschler, D., Patrick, T., Raqual, B., Yoder, B.K., and Porter, M.E.\*‡ (2003). A  
623 Novel Dynein Light Intermediate Chain Colocalizes with the Retrograde Motor for Intraflagellar  
624 Transport at Sites of Axoneme Assembly in *Chlamydomonas* and Mammalian Cells. *Mol. Biol.*  
625 *Cell* *14*, 2559–2569.  
626 Pigino, G., Geimer, S., Lanzavecchia, S., Paccagnini, E., Cantele, F., Diener, D.R., Rosenbaum,

627 J.L., and Lupetti, P. (2009). Electron-tomographic analysis of intraflagellar transport particle  
628 trains in situ. *J. Cell Biol.* *187*, 135–148.

629 Porter, M.E., Bower, R., Knott, J.A., Byrd, P., and Dentler, W. (1999). Cytoplasmic dynein heavy  
630 chain 1b is required for flagellar assembly in *Chlamydomonas*. *Mol. Biol. Cell* *10*, 693–712.

631 Prevo, B., Mangeol, P., Oswald, F., Scholey, J.M., and Peterman, E.J.G. (2015). Functional  
632 differentiation of cooperating kinesin-2 motors orchestrates cargo import and transport in *C.*  
633 *elegans* cilia. *Nat. Cell Biol.* *17*, 1536–1545.

634 Qin, H., Wang, Z., Diener, D., and Rosenbaum, J. (2007). Intraflagellar transport protein 27 is a  
635 small G protein involved in cell-cycle control. *Curr Biol* *17*, 193–202.

636 Rasala, B.A., Barrera, D.J., Ng, J., Plucinak, T.M., Rosenberg, J.N., Weeks, D.P., Oyler, G.A.,  
637 Peterson, T.C., Haerizadeh, F., and Mayfield, S.P. (2013). Expanding the spectral palette of  
638 fluorescent proteins for the green microalga *Chlamydomonas reinhardtii*. *Plant J.* *74*, 545–556.

639 Reck, J., Schauer, A.M., VanderWaal Mills, K., Bower, R., Tritschler, D., Perrone, C.A., and  
640 Porter, M.E. (2016). The role of the dynein light intermediate chain in retrograde IFT and  
641 flagellar function in *Chlamydomonas*. *Mol. Biol. Cell* *27*, 2404–2422.

642 Renault, T.T., Abraham, A.O., Bergmiller, T., Paradis, G., Rainville, S., Charpentier, E., Guet,  
643 C.C., Tu, Y., Namba, K., Keener, J.P., et al. (2017). Bacterial flagella grow through an injection-  
644 diffusion mechanism. *Elife* *6*, e23136.

645 Rompolas, P., Pedersen, L.B., Patel-King, R.S., and King, S.M. (2007). *Chlamydomonas*  
646 FAP133 is a dynein intermediate chain associated with the retrograde intraflagellar transport  
647 motor. *J Cell Sci* *120*, 3653–3665.

648 Rosenbaum, J.L., Moulder, J.E., and Ringo, D.L. (1969). Flagellar elongation and shortening in  
649 *Chlamydomonas*. The use of cycloheximide and colchicine to study the synthesis and assembly  
650 of flagellar proteins. *J. Cell Biol.* *41*, 600–619.

651 Satir, P., Pedersen, L.B., and Christensen, S.T. (2010). The primary cilium at a glance. *J. Cell Sci.*  
652 *123*, 499–503.

653 Shih, S.M., Engel, B.D., Kocabas, F., Bilyard, T., Gennerich, A., Marshall, W.F., and Yildiz, A.  
654 (2013). Intraflagellar transport drives flagellar surface motility. *Elife* *2*, e00744.

655 Signor, D., Wedatman, K.P., Orozco, J.T., Dwyer, N.D., Bargmann, C.I., Rose, L.S., and Scholey,  
656 J.M. (1999). Role of a class DHC1b dynein in retrograde transport of IFT motors and IFT raft  
657 particles along cilia, but not dendrites, in chemosensory neurons of living *Caenorhabditis*

658 *elegans*. *J. Cell Biol.* *147*, 519–530.  
659 Snow, J.J., Ou, G., Gunnarson, A.L., Walker, M.R.S., Zhou, H.M., Brust-Mascher, I., and  
660 Scholey, J.M. (2004). Two anterograde intraflagellar transport motors cooperate to build sensory  
661 cilia on *C. elegans* neurons. *Nat. Cell Biol.* *6*, 1109–1113.  
662 Stepanek, L., and Pigino, G. (2016). Microtubule doublets are double-track railways for  
663 intraflagellar transport trains. *Science* (80-. ). *352*, 721–724.  
664 Stephens, R.E. (2000). Preferential incorporation of tubulin into the junctional region of ciliary  
665 outer doublet microtubules: A model for treadmilling by lattice dislocation. *Cell Motil.*  
666 *Cytoskeleton* *47*, 130–140.  
667 Tam, L.W., Wilson, N.F., and Lefebvre, P.A. (2007). A CDK-related kinase regulates the length  
668 and assembly of flagella in *Chlamydomonas*. *J. Cell Biol.* *176*, 819–829.  
669 Williams, C.L., McIntyre, J.C., Norris, S.R., Jenkins, P.M., Zhang, L., Pei, Q., Verhey, K., and  
670 Martens, J.R. (2014). Direct evidence for BBSome-associated intraflagellar transport reveals  
671 distinct properties of native mammalian cilia. *Nat. Commun.* *5*, 5813.  
672 Wren, K.N., Craft, J.M., Tritschler, D., Schauer, A., Patel, D.K., Smith, E.F., Porter, M.E., Kner,  
673 P., and Lehtreck, K.F. (2013). A differential cargo-loading model of ciliary length regulation by  
674 IFT. *Curr. Biol.* *23*, 2463–2471.

#### 675 **Acknowledgments**

676 We would like to thank K. Augsperger for assistance with the isolation and screening of the  
677 *D1bLIC-Cherry KAP-GFP* tagged strains, and V. Belyy, J. Bandaria, and P. Qin for technical  
678 assistance. This work has been supported by NIH (GM094522 (AY), GM055667 (MEP)), and  
679 NSF (MCB-1055017 and MCB-1617028 (AY)).



680 **Figures**

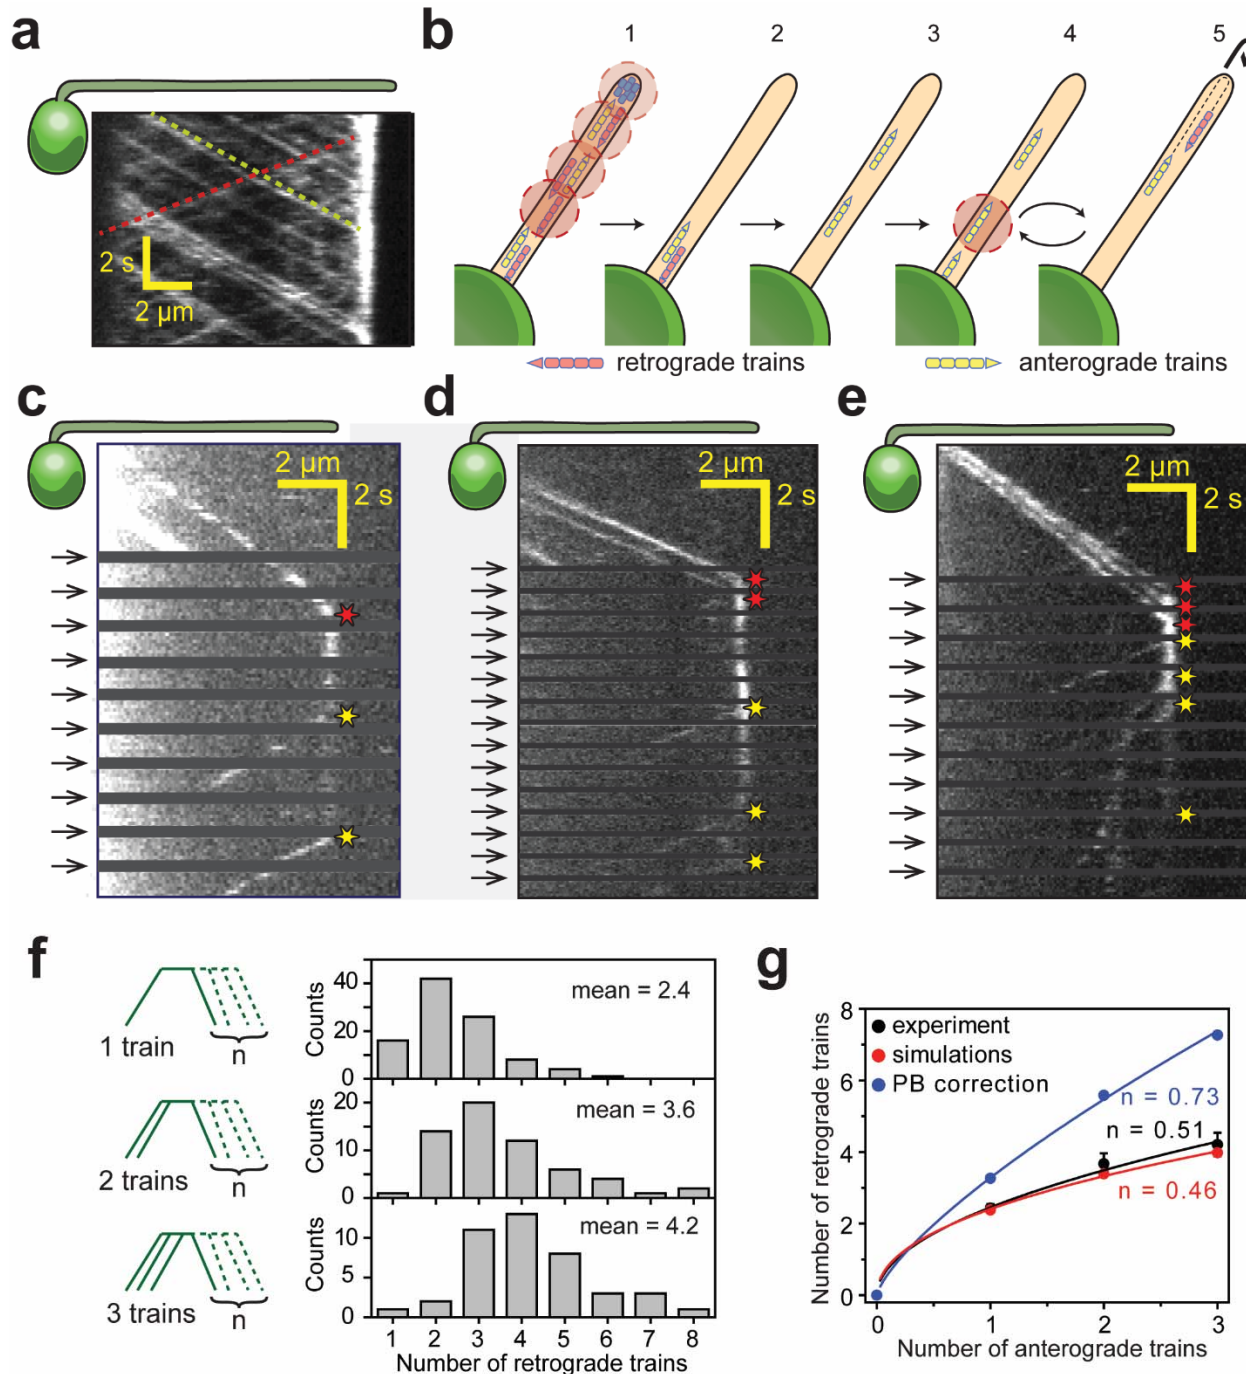

681

682 **Figure 1. IFT trains split apart and mix with each other at the flagellar tip.**

683 (a) Kymograph of a surface-immobilized *pf18 IFT27-GFP* strain shows that IFT trains move

684 bidirectionally along the flagellum, only reversing direction at the tip and the base. Multiple IFT

685 trains accumulate at the flagellar tip. Representative anterograde and retrograde trajectories are  
686 shown with yellow and red dashed lines, respectively. **(b)** Schematic representation of the  
687 PhotoGate assay. 1) The distal half of the flagellum is prebleached by moving the powerful gate  
688 beam from the flagellar tip to near the base of the flagellum. 2-3) The gate beam is turned off to  
689 allow a single anterograde train to enter the flagellum without photobleaching. 4) The beam is  
690 then repeatedly turned on to photobleach the successive trains entering the flagellum and 5)  
691 turned off for 0.8 s to image the single fluorescent train within the flagellum. Photobleached  
692 trains are not shown. **(c-e)** Kymographs of one (c), two (d) and three (e) fluorescent anterograde  
693 trains entering the flagellum. Anterograde trains pause at the flagellar tip and split into multiple  
694 retrograde trains that move back to the base. Arrival of fluorescent anterograde trains and  
695 departure of retrograde trains at the tip are shown with red and yellow stars, respectively. Arrows  
696 represent repetitive bleaching events near the base of the flagellum. **(f)** (Left) The number of  
697 fluorescent retrograde trains was quantified as a function of one, two or three fluorescent  
698 anterograde trains entering the flagellum after photobleaching. (Right) The average number of  
699 retrograde trains increased sub-proportionally with the number of fluorescent anterograde trains  
700 entering the flagellum.  $N = 97, 60, 42$  train events from top to bottom, in 160 cells, from 13  
701 independent experiments. **(g)** The number of detectable retrograde trains versus the numbers of  
702 incoming anterograde trains in PhotoGate experiments and Monte Carlo simulations (PB:  
703 photobleaching). Solid lines represent the fit of data to the power law ( $y = ax^n$ ).  $n$  is less than 1  
704 under each condition. Error bars represent s.e.m. ( $N = 5,000$  for simulations).



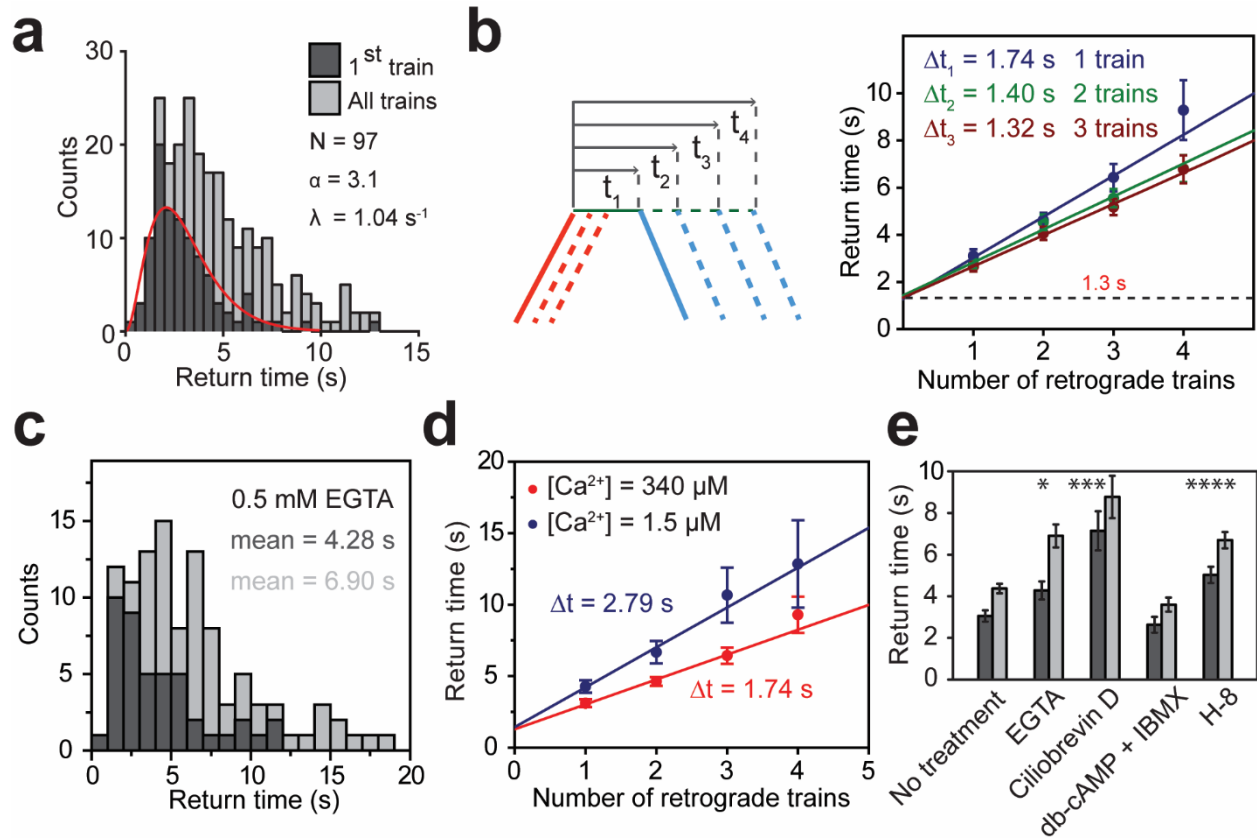

705

706 **Figure 2. Tip turnaround of IFT trains is a multistep process regulated by dynein activity**  
 707 **and extracellular  $\text{Ca}^{2+}$ .**

708 (a) The tip return time histogram of the first retrograde IFT27-GFP train (dark grey) and of  
 709 the trains (light grey). The histogram of the first retrograde trains was fitted to a Gamma function  
 710 (red curve).  $\alpha$  and  $\lambda$  are shape and rate parameters, respectively. (b) (Left) The schematic shows  
 711 the tip return time of the 1<sup>st</sup>, 2<sup>nd</sup>, 3<sup>rd</sup> and 4<sup>th</sup> retrograde IFT trains ( $t_1$ ,  $t_2$ ,  $t_3$ ,  $t_4$ ) emanating from  
 712 one, two, and three fluorescent anterograde trains arriving at the tip. (Right) The linear fit to the  
 713 average tip return time reveals that the time between successive trains ( $\Delta t$ ) decreases by the  
 714 number of anterograde trains, but the tip resting time (the y-intercept) remains constant (1.3 s).  
 715 Error bars represent s.e.m. (c) The return time histogram of IFT27-GFP trains with EGTA  
 716 treatment.  $N = 44$  train events in 35 cells over 4 independent experiments. (d) Averaged return  
 717 time of the 1<sup>st</sup>, 2<sup>nd</sup>, 3<sup>rd</sup> and 4<sup>th</sup> returning IFT27-GFP trains coming out of an anterograde train for

718 cells in TAP media (red, N = 97) and calcium-depleted media (blue, N = 44). Error bars represent  
719 s.e.m. (e) IFT27-GFP return times in various drug treatments. N = 97, 44, 34, 34, 52 retrograde  
720 trains from left to right, in a total of 22 independent experiments (\*p < 0.05, \*\*\*p < 0.001, \*\*\*\*  
721 p < 0.0001, as compared to no treatment). In (a), (c) and (e), the first trains returning from the tip  
722 are shown in dark grey and all trains are shown in light grey.

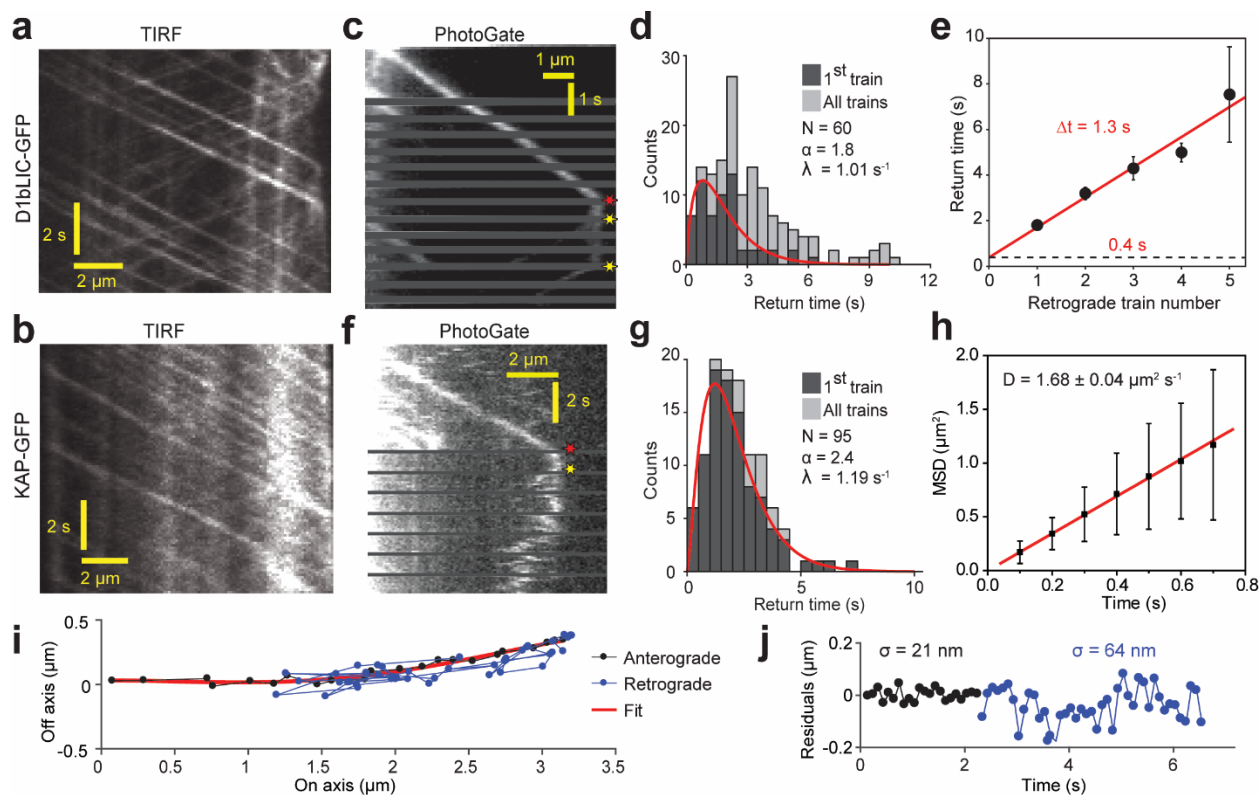

723

724 **Figure 3. PhotoGate reveals the tip turnaround behavior of IFT motors.**

725 (a) In a conventional TIR assay, anterograde and retrograde D1bLIC-GFP traces were clearly  
 726 visible, but the tip behavior of individual trains could not be discerned. (b) In a conventional TIR  
 727 assay, KAP-GFP was observed to move anterogradely, but the retrograde transport of KAP was  
 728 rarely observed. (c) PhotoGate imaging of D1bLIC-GFP shows that D1bLIC trains move to the  
 729 tip anterogradely, split into multiple trains, and return to the base retrogradely. Red and yellow  
 730 stars indicate arrival to and departure of D1bLIC-GFP from the tip, respectively. (d) Tip return  
 731 time histogram of D1bLIC-GFP. First train return times are fit to a gamma distribution (red  
 732 curve) with shape ( $\alpha$ ) and rate ( $\lambda$ ) parameters (mean  $\pm$  95% c.i.).  $N = 60$  anterograde trains in 60  
 733 cells over 9 independent experiments. (e) Averaged return time of the 1<sup>st</sup>, 2<sup>nd</sup>, 3<sup>rd</sup>, 4<sup>th</sup>, and 5<sup>th</sup>  
 734 D1bLIC-GFP particles returning from the tip (mean  $\pm$  s.e.m.). (f) Kymograph analysis of a KAP-  
 735 GFP cell imaged by PhotoGate. KAP undergoes active transport in the anterograde direction,

736 pauses at the flagellar tip, and diffuses back to the flagellar base. Arrows indicate the bleaching  
737 events. **(g)** KAP-GFP return time histogram. The red curve represents a fit of first train return  
738 times to a Gamma distribution.  $N = 95$  anterograde trains in 47 cells over 4 independent  
739 experiments. **(h)** MSD analysis of KAP-GFP movement after it leaves the flagellar tip. The  
740 average diffusion constant is  $1.68 \pm 0.04 \mu\text{m}^2 \text{s}^{-1}$  ( $N = 27$ , mean  $\pm$  s.e.m.). **(i)** High-resolution  
741 tracking of a KAP-GFP particle reveals the two-dimensional trajectory during anterograde  
742 (black) and diffusion (blue). The red curve is the polynomial fit to the trace. **(j)** The residual plot  
743 to the trace in (h) reveals lateral fluctuations during anterograde transport (black) and diffusive  
744 (blue) movement.

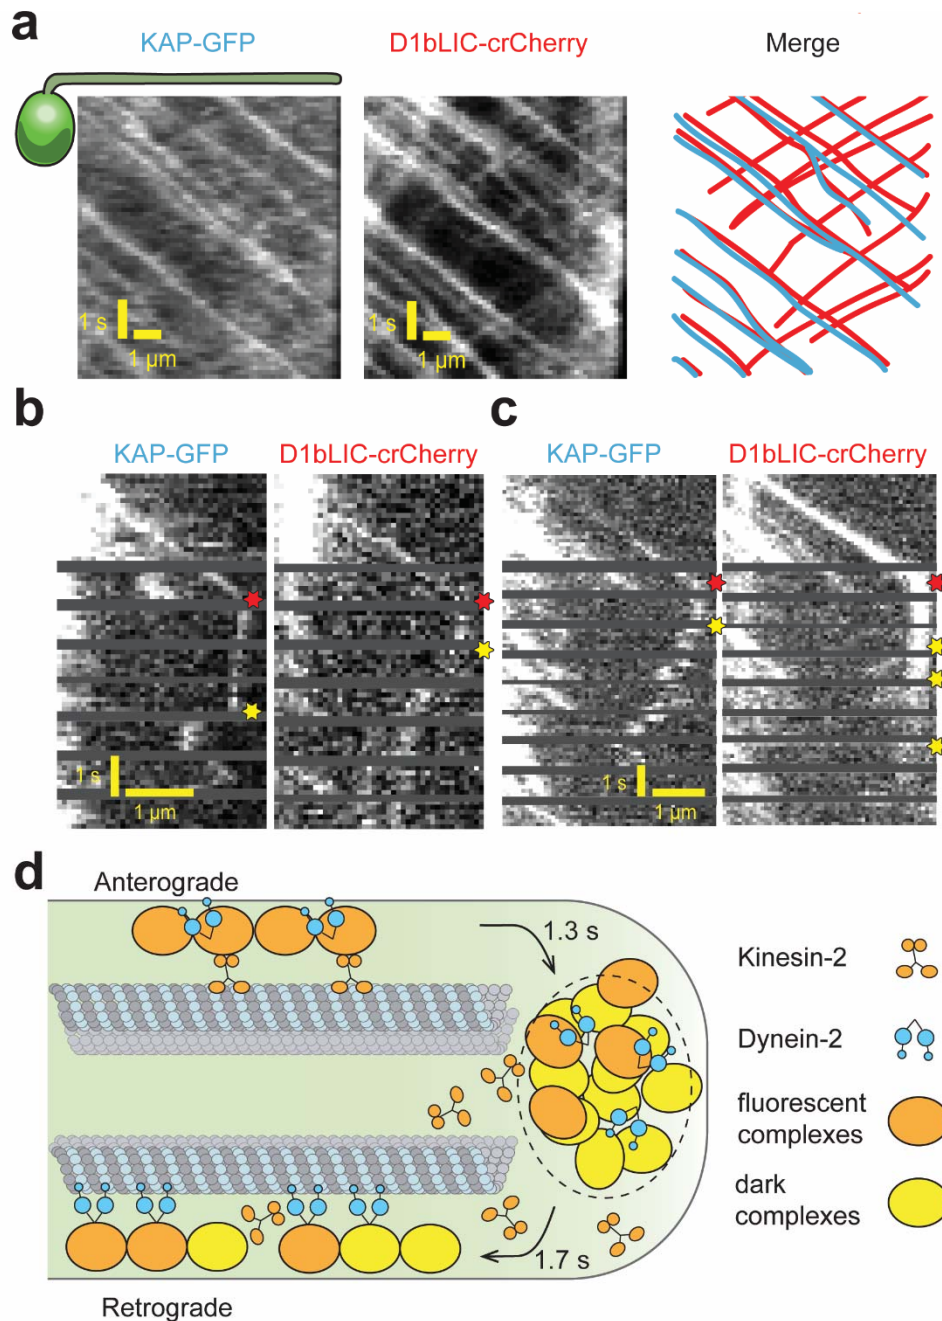

745

746 **Figure 4. Transport roles of kinesin-2 and dynein-2.**

747 **(a)** Representative kymographs of KAP-GFP and D1bLIC-crCherry in a *dlb1c::D1bLIC-*  
748 *crCherry KAP-GFP* flagellum. KAP-GFP and D1bLIC-crCherry co-localize on the IFT trains in  
749 the anterograde direction. Retrograde tracks are seen in the D1bLIC-crCherry channel, but are  
750 rarely visible in the KAP-GFP channel. **(b, c)** Two-color PhotoGate traces of KAP-GFP (left) and

751 D1bLIC-crCherry (right) in single flagella. KAP-GFP and D1bLIC-crCherry arrive at the tip on  
752 the same train. In (b), D1bLIC leaves the tip before KAP. In (c), KAP diffuses away from the tip  
753 before the departure of D1bLIC trains. Red and yellow stars indicate arrival to and departure  
754 from the flagellar tip, respectively. **(d)** A model for the turnover of IFT trains and motors at the  
755 flagellar tip. Kinesin-2 motors transport individual anterograde IFT trains to the flagellar tip.  
756 Dynein-2 is carried with anterograde trains as an inactive passenger. At the tip, IFT complexes  
757 detach from microtubules, disassemble, and mix with the tip protein pool to assemble new trains.  
758 These trains are transported retrogradely by dynein-2. Kinesin-2 detaches from IFT trains at the  
759 flagellar tip and diffuses back to the base by diffusion.

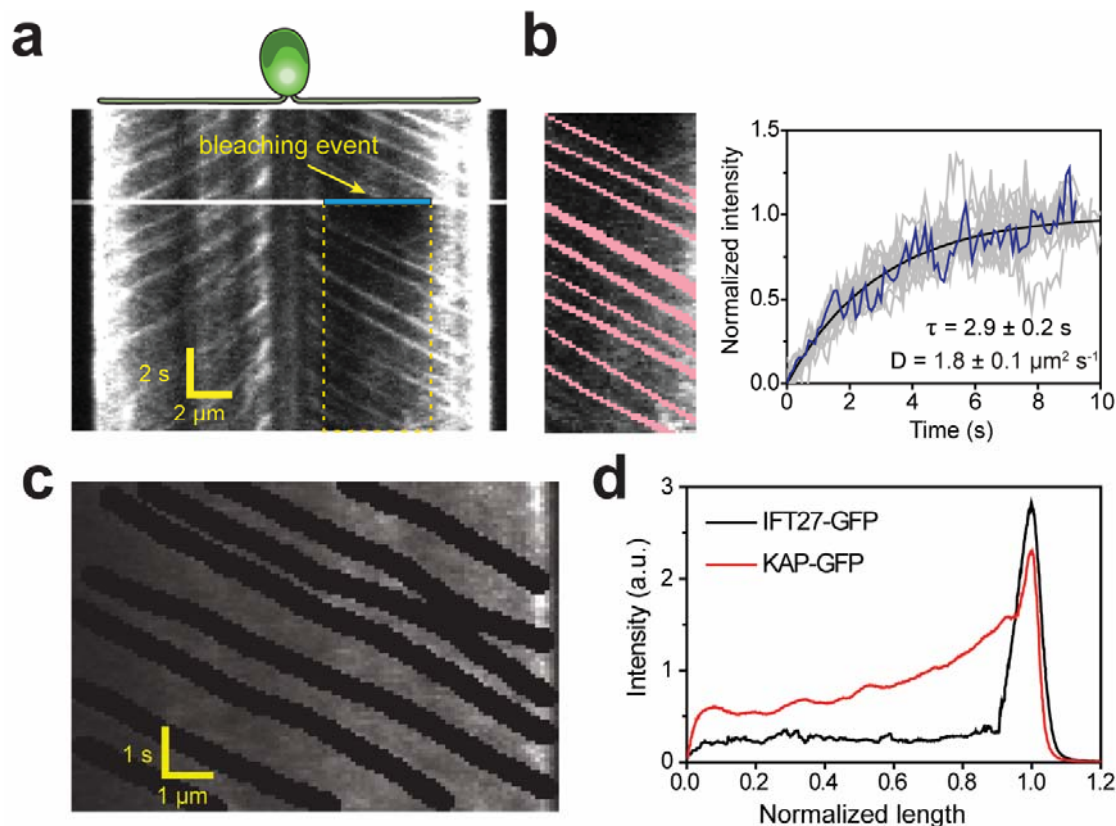

760  
761 **Figure 5. Diffusion of KAP from the flagellar tip leads to a concentration gradient along the**  
762 **flagellum.**

763 (a) Kymograph of KAP-GFP movement before and after photobleaching the middle section of  
764 the flagellum (blue area). While fluorescence recovery from the base is through anterograde  
765 movement, the recovery from the tip region is due to diffusion. (b) (Left) The GFP signal of  
766 anterograde traces (red) was manually subtracted from the rectangular area shown in (a). (Right)  
767 The intensity in the photobleached area shows recovery as a function of time (blue line). The  
768 average recovery signal of 13 cells (grey lines) was fitted to a one-dimensional diffusion  
769 equation (black curve,  $\pm 95\%$  c.i.). (c) In conventional TIR imaging, anterograde trajectories of  
770 KAP-GFP were manually subtracted from the kymograph. (d) The average GFP signal along the  
771 length of a flagellum in KAP-GFP and IFT27-GFP cells after the removal of anterograde and  
772 retrograde transport traces from the kymographs. Flagellar base and tip positions were



773 normalized to 0 and 1, respectively. N = 11 for both KAP-GFP and IFT27-GFP.

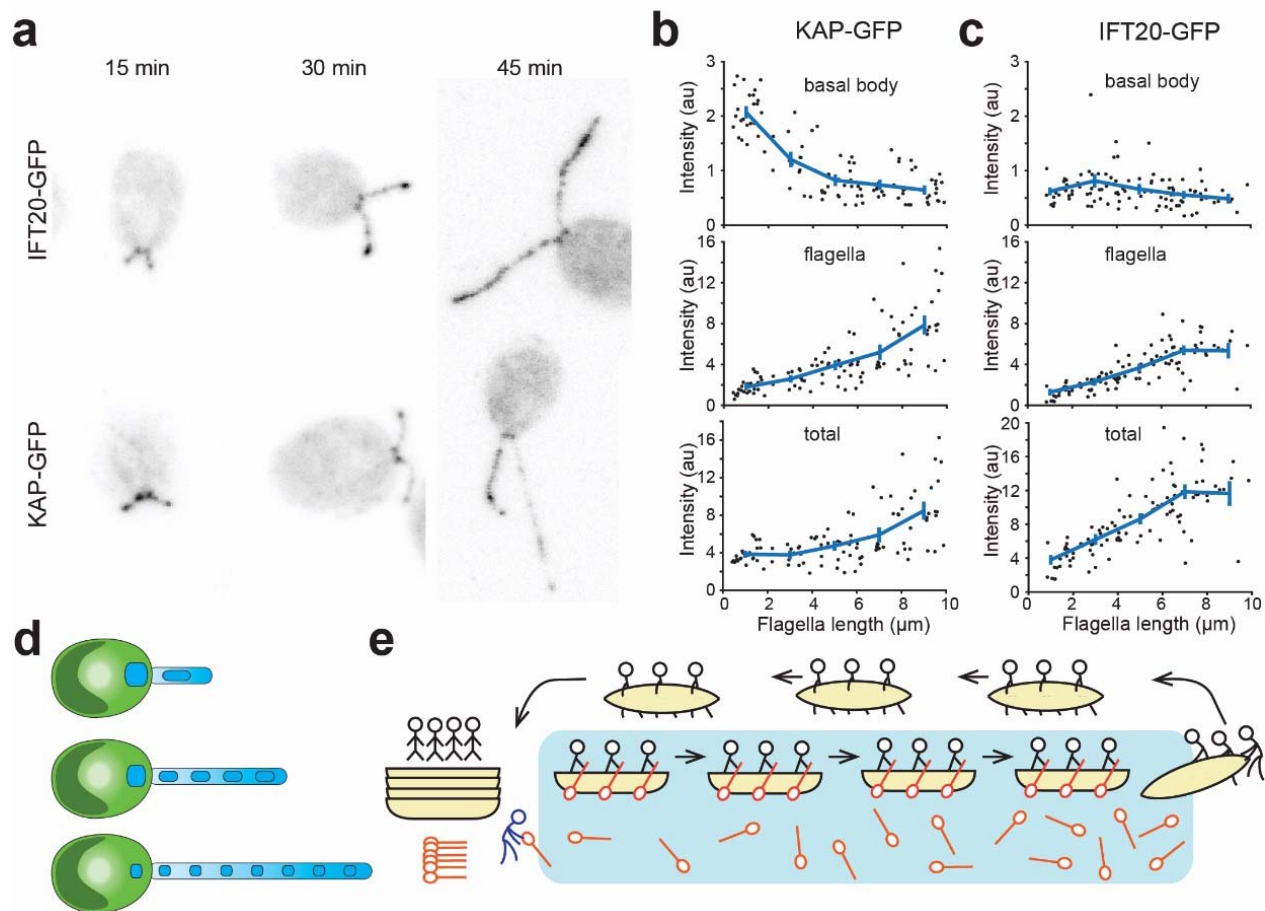

774

775 **Figure 6. Kinesin-2 accumulates in flagella and is depleted at the basal body during**  
776 **flagellar growth.**

777 (a) Representative confocal images show the distribution of IFT20-GFP and KAP-GFP  
778 fluorescence at the basal body region and in the flagella during flagellar regrowth. (b,c)  
779 Integrated KAP-GFP (b) and IFT20-GFP (c) fluorescence at the basal body (top), in the  
780 flagellum (middle), and in both regions (bottom) at different flagellar lengths. Each black dot  
781 represents a single cell and the blue line is the running average ( $\pm$ s.e.m.). For KAP-GFP, N = 104  
782 flagella from 70 cells over 2 independent experiments. For IFT20-GFP, N = 103 flagella from 56  
783 cells over 2 independent experiments. (d) A model for flagellar length control. When the  
784 flagellum is short, IFT trains contain more kinesin-2 from the large basal body pool. As flagella



785 elongate, the number of kinesin-2 per IFT train decreases because a significant fraction of the  
786 kinesin-2 unloads at the tip and undergoes diffusion in the flagellar lumen, depleting the kinesin-  
787 2 pool at the flagellar base. (e) An analogy for KAP loading on IFT trains. Boats (IFT trains) are  
788 laden with rowers (dynein-2) with oars (kinesin-2) as they row to the right shore. At the beach,  
789 the rowers get out, leave their oars on the water, and walk the boats back to the dock. Oars can  
790 only be collected when they randomly float back to the left shore. If the distance between the  
791 shores is large, oars build up on the water and are not readily available for new boats.  
792

793 **Supplementary Information**

794 **1. Figure Supplements**

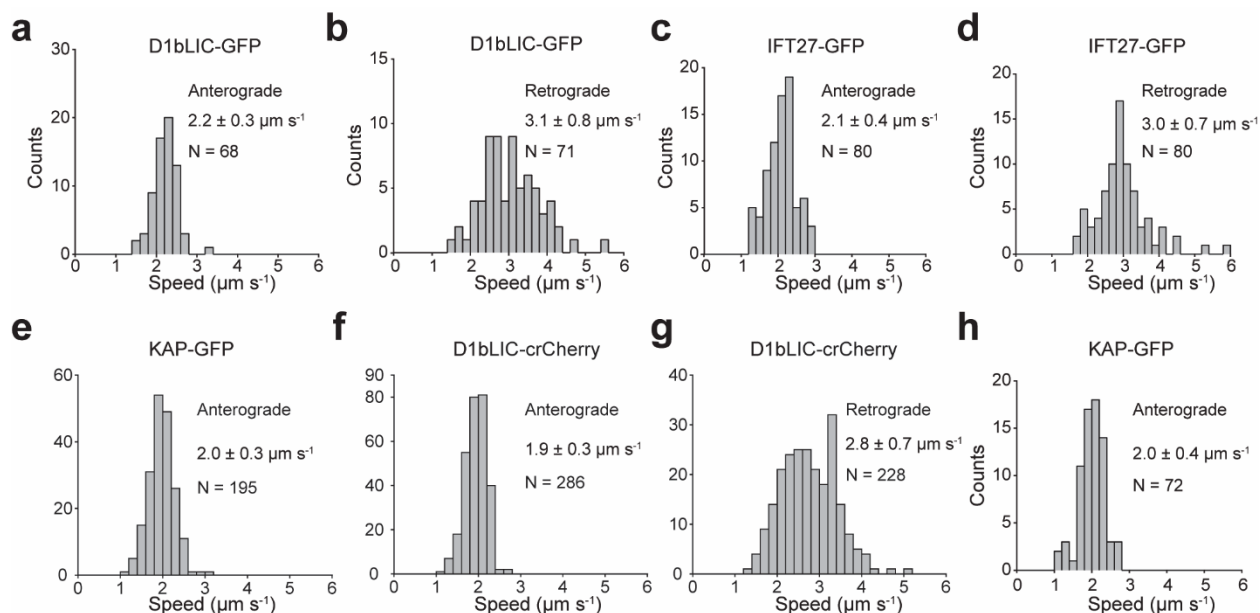

795  
796 **Figure 1-Figure Supplement 1. Anterograde and retrograde velocities of epitope-tagged**  
797 **IFT27, KAP, and D1bLIC.**

798 (a) Anterograde velocities of D1bLIC-GFP in *dlb1c::D1bLIC-GFP* cells. (b) Retrograde  
799 velocities of D1bLIC-GFP in *dlb1c::D1bLIC-GFP* cells. (c, d) Anterograde (c) and retrograde  
800 (d) velocities of IFT27-GFP in *pf18 IFT-27-GFP* cells. (e) Anterograde velocities of KAP-GFP  
801 in *dlb1c::D1bLIC-crCherry KAP-GFP* cells. (f, g) Anterograde (f) and retrograde (g) velocities  
802 of D1bLIC-crCherry in *dlb1c::D1bLIC-crCherry KAP-GFP* cells. (h) Anterograde velocities of  
803 KAP-GFP in *fla3::KAP-GFP* cells. All velocities are reported as mean  $\pm$  s.d.

804

805

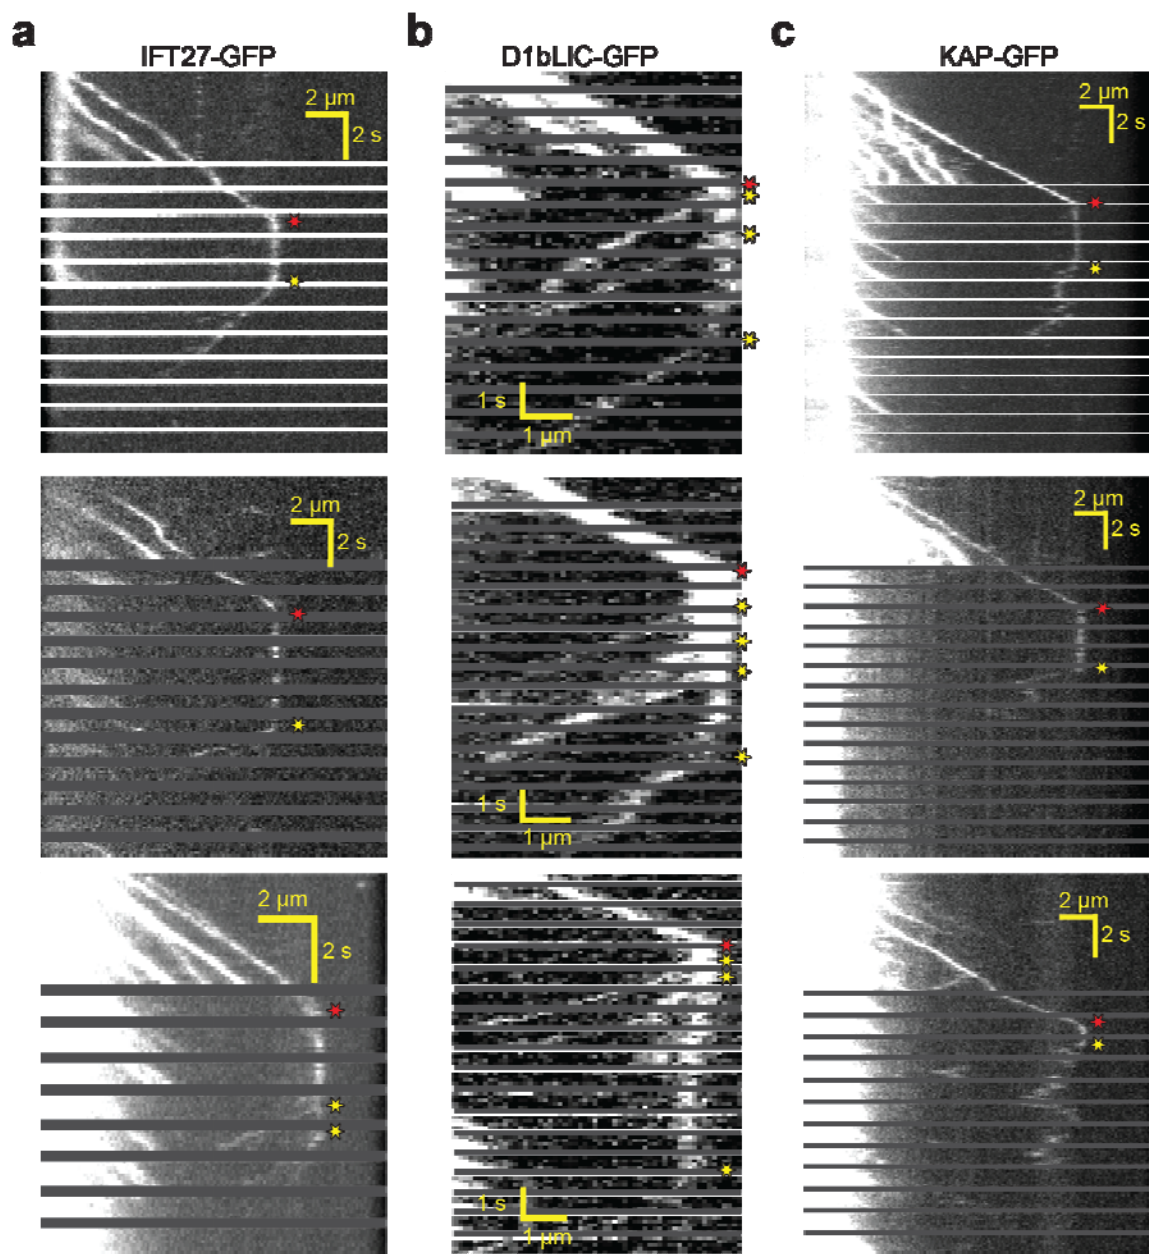

806

807 **Figure 1-Figure Supplement 2. Additional examples for PhotoGate imaging of IFT27,**  
808 **D1bLIC, and KAP.**

809 **(a)** IFT27 is moved to the tip on anterograde trains, remodels, and returns to the flagellar base on  
810 retrograde trains. **(b)** Dynein is moved to the tip on anterograde trains, remodels, and moves  
811 retrogradely to the cell body. **(c)** Kinesin moves anterograde trains to the flagellar tip, dissociates  
812 from the IFT trains at the tip, and diffuses within the flagellum. Red and yellow stars indicate

813 arrival to and departure from the tip, respectively.

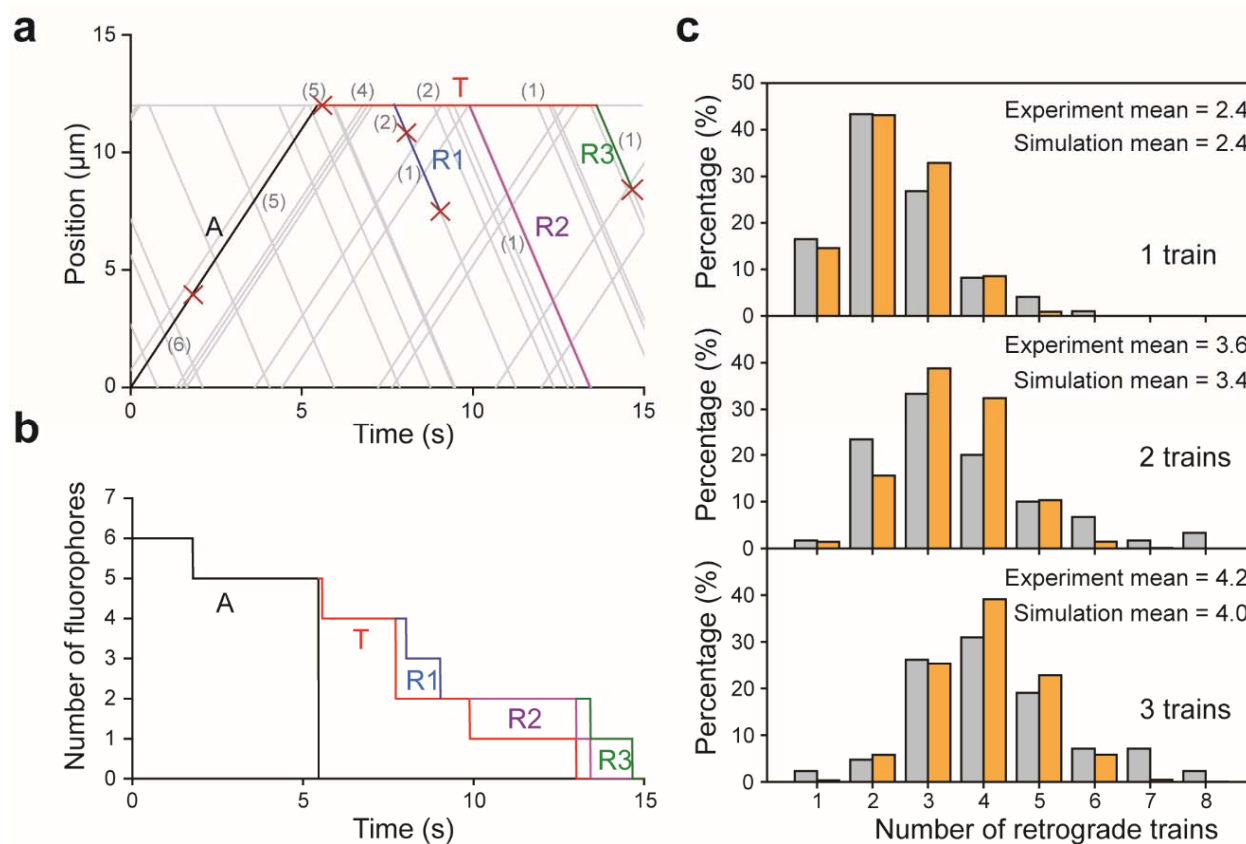

814  
815

816 **Figure 1-Figure Supplement 3. Monte Carlo simulations for the dynamics of IFT trains at**  
817 **the flagellar tip.**

818 **(a)** A simulated kymograph with one anterograde IFT train (label A, black line) reaching the  
819 flagellar tip, joining the pool at the tip (label T, red line), and returning as three retrograde IFT  
820 trains (label R1-R3; blue, purple, and green lines). The anterograde train originally carries 6  
821 bright fluorophores, and each fluorophore either bleaches or returns back to the flagellar base.  
822 The number of fluorophores is labeled in grey color within parentheses, and each bleaching  
823 event is indicated by a red cross. **(b)** The number of fluorophores in the anterograde train (label  
824 A, black line), at the flagellar tip (label T, red line), and the retrograde trains (label R1-R3, blue

825 line, purple line and green line) are shown as a function of time. Step-by-step reduction in GFP  
826 numbers in anterograde and retrograde trains is due to photobleaching of GFPs at  $0.05 \text{ s}^{-1}$  under  
827 TIR illumination. (c) The number of detectable retrograde trains in PhotoGate assays with one,  
828 two, and three fluorescent anterograde trains arriving at the tip. Gray and orange bars show the  
829 results of experiments in Figure 1f and Monte Carlo simulations, respectively ( $N = 5,000$  for  
830 simulations).

831

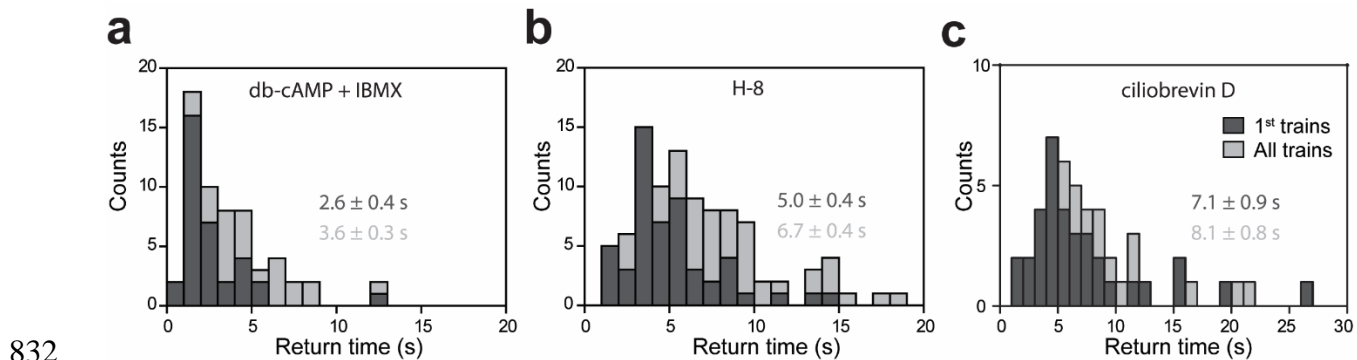

833 **Figure 2-Figure Supplement 1. Tip return time of IFT27-GFP under various drug**  
834 **treatments.**

835 (a) Return time histogram of IFT27-GFP with db-cAMP and IBMX treatment. N = 34 trains in  
836 25 cells. (b) Return time histogram of IFT27-GFP with H-8 treatment. N = 52 trains in 32 cells.  
837 (c) Return time histogram of IFT27-GFP with ciliobrevin D treatment. N = 34 trains in 27 cells  
838 (mean  $\pm$  s.e.m.).

839

840

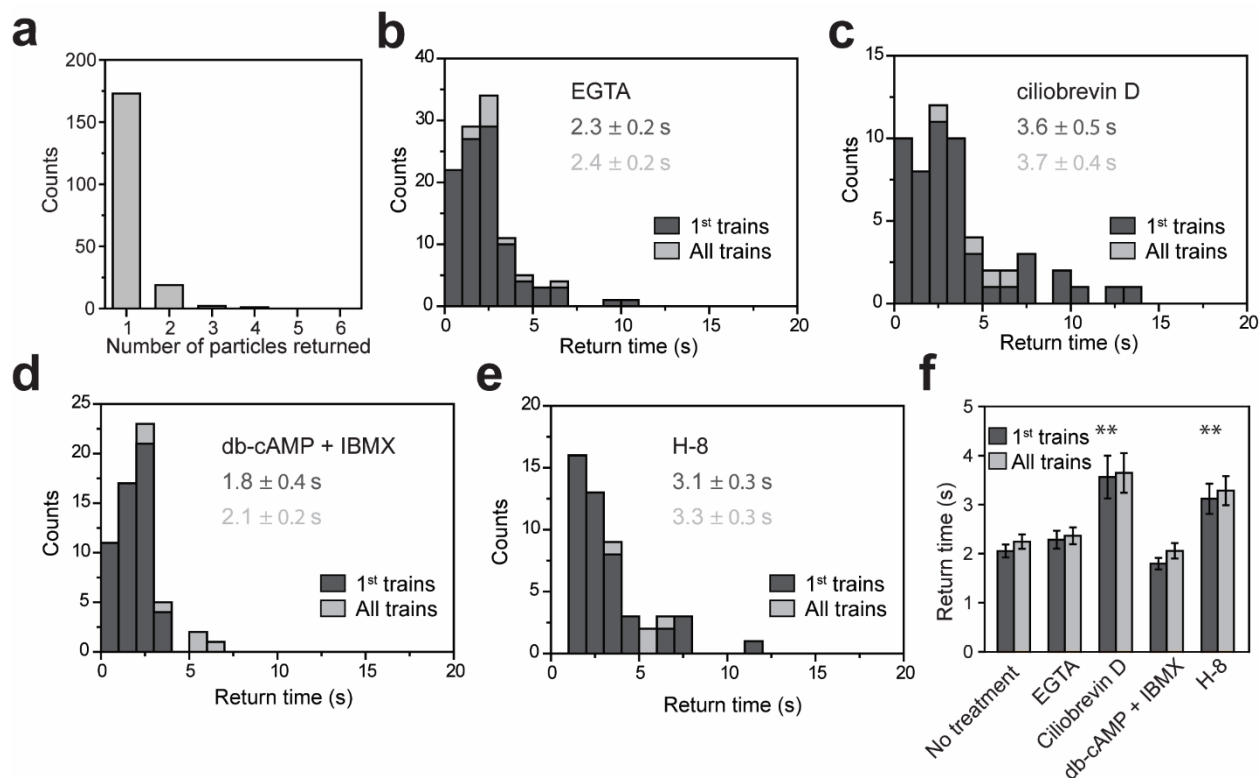

841  
 842 **Figure 3-Figure Supplement 1. Tip return time of KAP-GFP under various drug**  
 843 **treatments.** (a) The number of fluorescent KAP particles emanating from a single fluorescent  
 844 anterograde KAP particle at the tip. N = 195 trains in 106 cells over 9 independent experiments.  
 845 All KAP clusters displayed diffusive movement after leaving the tip. (b) Return time histogram  
 846 of KAP-GFP with EGTA treatment. N = 100 trains in 59 cells over 5 independent experiments.  
 847 (c) Return time histogram of KAP-GFP with ciliobrevin D treatment. N = 52 trains in 37 cells  
 848 over 4 independent experiments. (d) Return time histogram of KAP-GFP with db-cAMP and  
 849 IBMX treatment. N = 53 trains in 28 cells over 2 independent experiments. (e) Return time  
 850 histogram of KAP-GFP with H-8 treatment. N = 46 trains in 18 cells. (f) The average tip return  
 851 times for KAP-GFP under various drug treatments (mean  $\pm$  s.e.m.; \*\*p < 0.01 as compared to no  
 852 treatment).

853



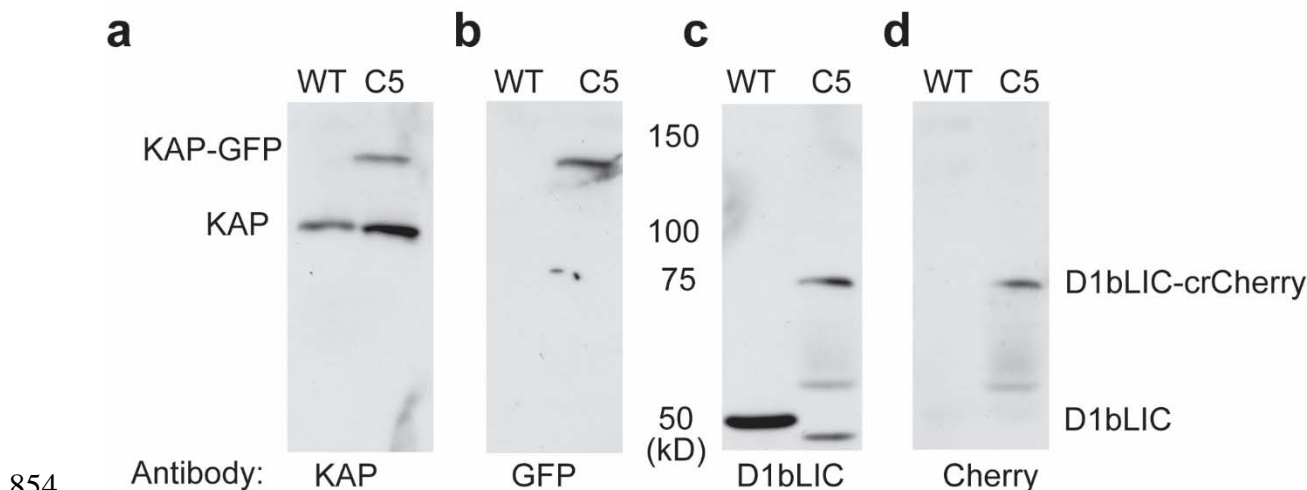

854

855 **Figure 4-Figure Supplement 1. Expression of KAP-GFP and D1bLIC-crCherry in isolated**  
856 **flagella from a double-tagged strain.**

857 Isolated flagella from wild-type cells (WT) and a *d1blic::D1bLIC-crCherry KAP-GFP* strain  
858 (C5) were analyzed on Western blots probed with antibodies against (a) KAP, (b) GFP, (c)  
859 D1bLIC, and (d) Cherry. The endogenous KAP subunit migrates at ~95 kD in both strains (a),  
860 and the KAP-GFP subunit migrates at ~122 kD (a, b). The D1bLIC subunit migrates at ~49 kD  
861 in WT (c) and the D1bLIC-crCherry migrates at ~75 kD in the C5 rescued strain (c, d).

862

863

864

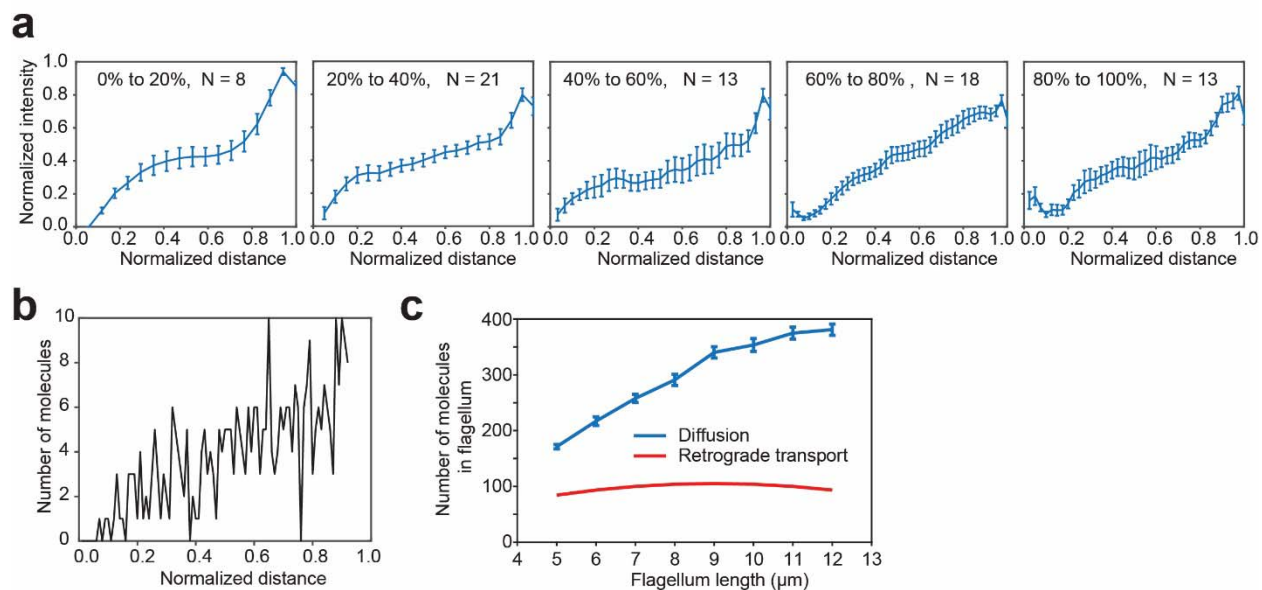

865

866 **Figure 5-Figure Supplement 1. A gradient of KAP-GFP fluorescence along the length of the**  
867 **flagellum exists across all flagellar lengths.**

868 **(a)** The gradient of KAP-GFP fluorescence is approximately linear over the length of the  
869 flagellum for flagella of different lengths. Cells undergoing flagellar regrowth were imaged and  
870 split into groups by their flagellar length. IFT trains were manually removed from kymographs  
871 and remaining pixels were time-averaged to calculate the concentration gradient of the KAP-  
872 GFP. Error bars represent s.e.m. N = 57 kymographs over 5 independent experiments. **(b)** Monte  
873 Carlo simulations reveal the flagellar distribution of KAP-GFP diffusing from a source at the tip  
874 (right) to a sink at the base (left). **(c)** Simulations show that return of KAP to the cell body by  
875 diffusion leads to a greater accumulation of KAP in the flagellum, in comparison to a  
876 hypothetical case where KAP returns to the cell body via retrograde transport. This analysis  
877 accounts for both anterogradely moving and diffusing KAP molecules.

878

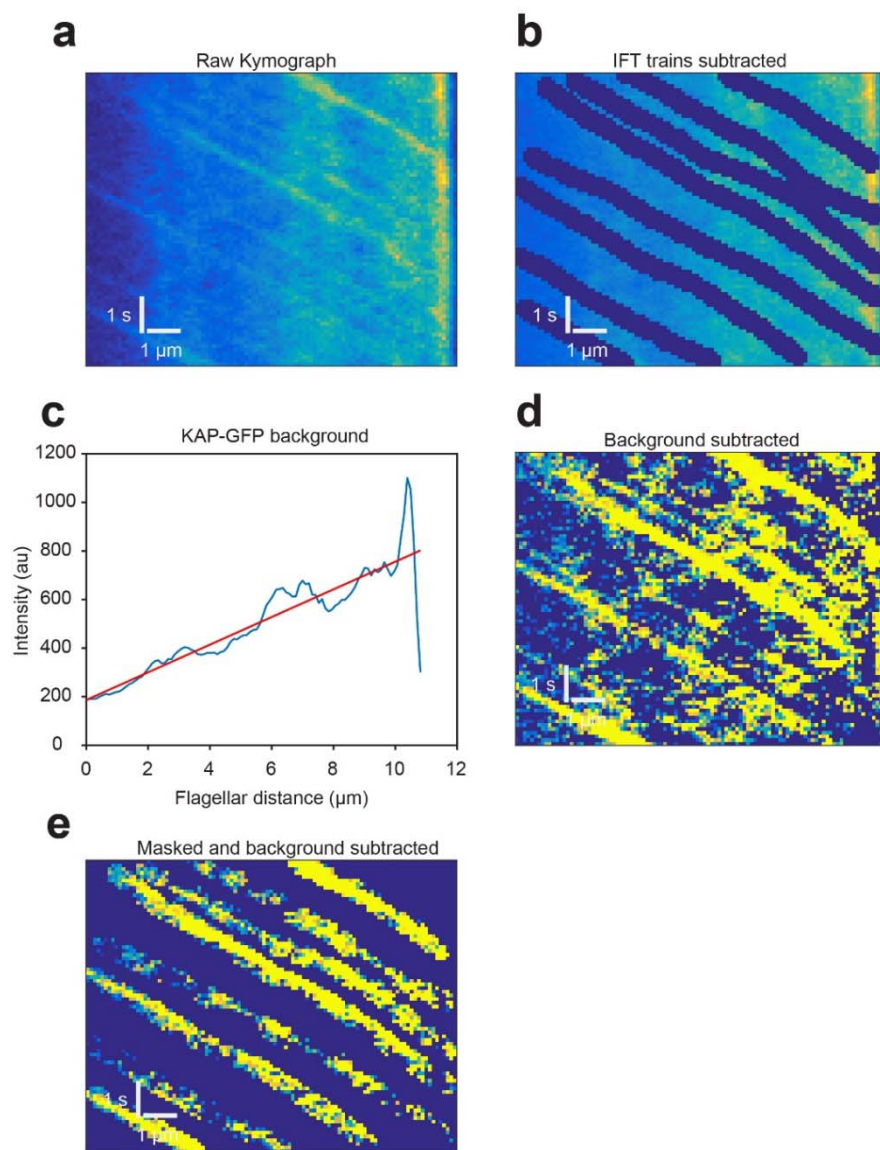

879

880 **Figure 5-Figure Supplement 2. The influx and efflux of KAP-GFP fluorescence in fully**  
881 **grown flagella are equal.**

882 **(a)** An example kymograph of a *fla3::KAP-GFP* flagellum imaged with TIR. The flagellar tip is  
883 on the right. **(b)** To calculate the intensity of the fluorescence background, anterograde  
884 trajectories of KAP were manually subtracted from the kymograph. **(c)** Intensities were time-  
885 averaged to calculate KAP-GFP background. Efflux was calculated from Fick's law using the  
886 slope of the intensity profile along the flagellar length and the measured diffusion constant (1.7

887  $\mu\text{m}^2 \text{s}^{-1}$ ). **(d)** Background was subtracted from original kymograph to get anterograde train  
888 intensities. **(e)** The kymograph was masked for anterograde trains to calculate the average  
889 fluorescent counts per train. Influx was calculated by multiplying counts per train with the  
890 measured train frequency ( $1.3 \text{ s}^{-1}$ ). KAP-GFP influx into the flagellum ( $1,130 \pm 70 \text{ counts s}^{-1}$ )  
891 was similar to the efflux of KAP from the flagellum ( $1,170 \pm 160 \text{ counts s}^{-1}$ ).  $N = 57$  kymographs  
892 over 5 independent experiments (mean  $\pm$  s.e.m.).

893

894        **2. Video Legends**

895        **Video 1. Tracking of individual IFT trains in *Chlamydomonas*.** IFT movement was visualized  
896 by TIR imaging of a surface-adhered *pf18 IFT27-GFP* cell. Green and blue arrows represent the  
897 cell body and flagellar tips, respectively. The size of the window is  $15.5 \times 27.6 \mu\text{m}$ . The movie  
898 was recorded at  $10 \text{ frames s}^{-1}$  and is played in real time. This video corresponds to Figure 1a.

899        **Video 2. Observing the dynamics of single IFT trains at the flagellar tip using the**  
900 **PhotoGate.** The distal half of the flagellum on the right of a surface-adhered *pf18 IFT27-GFP*  
901 cell is photobleached by an intense laser beam. The gate beam is turned off to allow a single  
902 anterograde train to enter the bleached region and turned on repeatedly at the base of the  
903 flagellum to bleach the subsequent anterograde trains. Two retrograde trains emanate from a  
904 single fluorescent anterograde train at the tip. Frames with the gate beam on are removed for  
905 illustration purposes. The movie was recorded at  $10 \text{ frames s}^{-1}$  and is played in real time. Cyan  
906 and magenta arrows represent anterograde and retrograde particles, respectively. Pre-bleaching  
907 frames are marked by red borders. The position of the PhotoGate is marked by a red line. This  
908 video corresponds to Figure 1c.

909        **Video 3. Tip return dynamics of two fluorescent anterograde trains using the PhotoGate.** A  
910 flagellum of a surface-adhered *pf18 IFT27-GFP* cell is photobleached. Two fluorescent  
911 anterograde IFT trains are allowed pass through the gate without photobleaching and subsequent  
912 anterograde trains were photobleached by the gate beam. After the anterograde trains reach the  
913 tip, three retrograde trains return with fluorescent signal from these trains. The movie was  
914 recorded at  $10 \text{ frames s}^{-1}$  and is played in real time. Cyan and magenta arrows represent  
915 anterograde and retrograde particles, respectively. The position of the PhotoGate is marked by a  
916 red line. This video corresponds to Figure 1d.

917 **Video 4. Tip return dynamics of three fluorescent anterograde trains using the PhotoGate.**

918 A flagellum of a surface-adhered *pf18 IFT27-GFP* cell is photobleached. Three fluorescent  
919 anterograde IFT trains are allowed pass through the gate without photobleaching and subsequent  
920 anterograde trains were photobleached by the gate beam. The frames in which the gate beam was  
921 on were deleted for illustration purposes. After the anterograde trains reach the tip, four  
922 retrograde trains return with fluorescent signal from these trains. The movie was recorded at 10  
923 frames  $s^{-1}$  and is played in real time. Cyan and magenta arrows represent anterograde and  
924 retrograde particles, respectively. Pre-bleaching frames are marked by red borders. The position  
925 of the PhotoGate is marked by a red line. This video corresponds to Figure 1e.

926 **Video 5. Tip return dynamics of D1bLIC-GFP.** In a surface-adhered *dlb1c::D1bLIC-GFP*

927 cell, one D1bLIC-GFP particle is allowed to pass through the gate without photobleaching and  
928 two fluorescent retrograde particles return to the base. The movie was recorded at 10 frames  $s^{-1}$   
929 and is played in real time. Cyan and magenta arrows represent anterograde and retrograde  
930 particles, respectively. Pre-bleaching frames are marked by red borders. The position of the  
931 PhotoGate is marked by a red line. This video corresponds to Figure 3c.

932 **Video 6. KAP-GFP dissociates from IFT trains at the tip.** In the *fla3::KAP-GFP* strain, one

933 fluorescent KAP-GFP particle is allowed to pass through the gate without photobleaching. The  
934 KAP-GFP particle undergoes diffusive motion after arriving at the flagellar tip. The size of the  
935 window is  $26.6 \times 16.6 \mu\text{m}$ . The movie was recorded at 10 frames  $s^{-1}$  and is played in real time.  
936 Cyan and magenta arrows represent anterograde and diffusing particles, respectively. The  
937 position of the PhotoGate is marked by a red line. This video corresponds to Figure 3f.

938 **Video 7. Dual color imaging of KAP-GFP and D1bLIC-crCherry.** The movement of KAP-

939 GFP and D1bLIC-crCherry are simultaneously tracked in a surface-adhered *dlb1c::D1bLIC-*

940 *crCherry KAP-GFP* cell. KAP and D1bLIC co-localize in the anterograde direction. D1bLIC  
941 displays retrograde tracks while retrograde transport of KAP is rarely seen. KAP-GFP channel is  
942 on the left and D1bLIC-*crCherry* channel is on the right. The movie was recorded at 8.3 frames s<sup>-1</sup>  
943 and is played in real time. This video corresponds to Figure 4a.

944 **Video 8. Recovery of KAP-GFP after photobleaching the middle section of a flagellum.** A  
945 surface-adhered *fla3::KAP-GFP* is imaged under TIRF illumination. The middle part of the  
946 flagellum is bleached by a 25 kW cm<sup>-2</sup> laser beam for 0.1 s and the cell is imaged under 100 W  
947 cm<sup>-2</sup> TIRF excitation. The fluorescent signal recovers with different kinetics from each side of  
948 the flagellum. The data was collected at 10 frames s<sup>-1</sup> and is played in real time. Green and blue  
949 arrows represent the cell body and flagellar tips, respectively. The photobleached area is marked  
950 by thin red lines. This video corresponds to Figure 5a.

951

952
